# Supplementary material
Source: publisher figshare collection journal article supplement (https://acs.figshare.com/ndownloader/files/6505857)

**Palladium Catalyzed, Multicomponent Synthesis of Fused-Ring Pyrroles from Aryl Iodides,  
Carbon Monoxide and Alkyne-Tethered Imines**

Neda Firoozi<sup>†‡</sup> Gerardo M. Torres<sup>†</sup> and Bruce A.  
Arndtsen<sup>‡\*</sup>

<sup>‡\*</sup>Department of Chemistry, McGill University, 801 Sherbrooke Street West, Montreal, Quebec,  
H3A 0B8, Canada

<sup>†</sup>Department of Chemistry, Faculty of Sciences, Ferdowsi University of Mashhad, Mashhad,  
9177948974, Iran

**Supporting Information**

**Table of Contents**

|             |                                                       |            |
|-------------|-------------------------------------------------------|------------|
| <b>I.</b>   | <b>Use of ortho-Alkyne-Tethered Aryl Iodides.....</b> | <b>S-2</b> |
| <b>II.</b>  | <b>References.....</b>                                | <b>S-3</b> |
| <b>III.</b> | <b>NMR Spectra.....</b>                               | <b>S-4</b> |

## I. Use of *ortho*-Alkyne-Tethered Aryl Iodides

### Substrate Synthesis

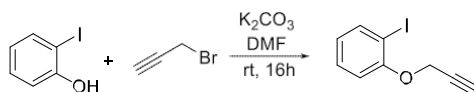

In analogy to literature reports,<sup>1</sup> solution of 2-iodophenol (858 mg, 3.9 mmol) and K<sub>2</sub>CO<sub>3</sub> (815 mg, 5.9 mmol) in DMF (15 ml) was prepared in a 100 mL round bottom flask equipped with a magnetic stir bar. The solution was allowed to stir for 20 minutes at room temperature. To the solution was added a propargyl bromide solution in toluene 80% w/w (758 mg, 5.1 mmol). The reaction mixture was stirred overnight at room temperature. Water (20 mL) was then added and the resulting mixture was extracted three times with diethyl ether (15 mL portions). The ether fractions were combined and filtered through MgSO<sub>4</sub>. The solvent was removed *in vacuo* and the crude residue was purified by column chromatography on silica gel (eluent: n-hexane/ethyl acetate 10:1) to afford 1-iodo-2-(prop-2-yn-1-yloxy)benzene as a colorless liquid in 80% yield (798 mg, 3.1 mmol).

### Attempted Synthesis of Pyrrole with *ortho*-Alkyne-Tethered Aryl Iodide, Imine, and CO

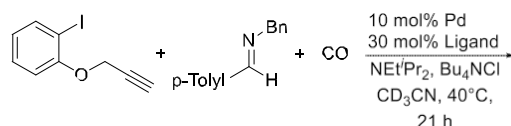

In a glovebox, *ortho*-alkyne tethered aryl iodide (12 mg, 0.045 mmol), (p-tolyl)HC=N-Bn (6.3 mg, 0.03 mmol), NEt<sup>t</sup>Pr<sub>2</sub> (7.8 mg, 0.06 mmol), [Pd(allyl)Cl]<sub>2</sub> (0.5 mg, 0.0015 mmol), Bu<sub>4</sub>NCl (17 mg, 0.06 mmol), P<sup>t</sup>Bu<sub>3</sub> (1.8 mg, 0.009 mmol) (or other ligands, see Table S1 below) and BnOBz internal standard (3.2 mg, 0.015 mmol) were transferred to a J-Young NMR with three 0.25 mL portions of CD<sub>3</sub>CN. The NMR tube was then sealed with a screw-cap, taken out of the glovebox, and charged with 4 atm of CO. The tube was then heated in an oil bath at 40 °C. The reaction was analyzed by <sup>1</sup>H NMR over the course of 21 h, and the consumption of starting material was quantified via integration against the internal standard. <sup>1</sup>H NMR analysis reveals the protonation of the base and the partial disappearance of the aryl iodide. In most cases, imine is left intact and there is no evidence of pyrrole formation.

**Table S1. Reactivity of *ortho*-alkyne tethered aryl iodide, imine, and CO**

| Entry | Pd Cat.                                              | PR <sub>3</sub>                                                                   | Remaining Aryl Iodide (%) <sup>c</sup> | Remaining Imine (%) | Pyrrole (%) |
|-------|------------------------------------------------------|-----------------------------------------------------------------------------------|----------------------------------------|---------------------|-------------|
| 1     | Pd(OAc) <sub>2</sub>                                 | PPh <sub>3</sub>                                                                  | 34                                     | 94                  | -           |
| 2     | Pd <sub>2</sub> dba <sub>3</sub> .CH <sub>3</sub> Cl | -                                                                                 | 38                                     | 96                  | -           |
| 3     | [{Pd(allyl)Cl} <sub>2</sub> ]                        | P <sup>t</sup> Bu <sub>3</sub>                                                    | 5                                      | 94                  | -           |
| 4     | [{Pd(allyl)Cl} <sub>2</sub> ]                        | P( <i>o</i> -tolyl) <sub>3</sub>                                                  | 67                                     | 87                  | -           |
| 5     | [{Pd(allyl)Cl} <sub>2</sub> ]                        | 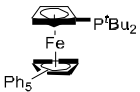 | 5                                      | 49                  | -           |

## II. References

- (1) Hadden, M.; Goodman, A.; Guo, C.; Guzzo, P. R.; Henderson, A. J.; Pattamana, K.; Ruenz, M.; Sargent, B. J.; Swenson, B.; Yet, L. *Bioorg. Med. Chem. Lett.* **2010**, *20*, 2912.

### III. NMR Spectra

#### $^1\text{H}$ and $^{13}\text{C}$ NMR spectra of Alkyne-tethered Aryl Iodide

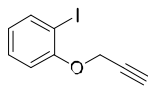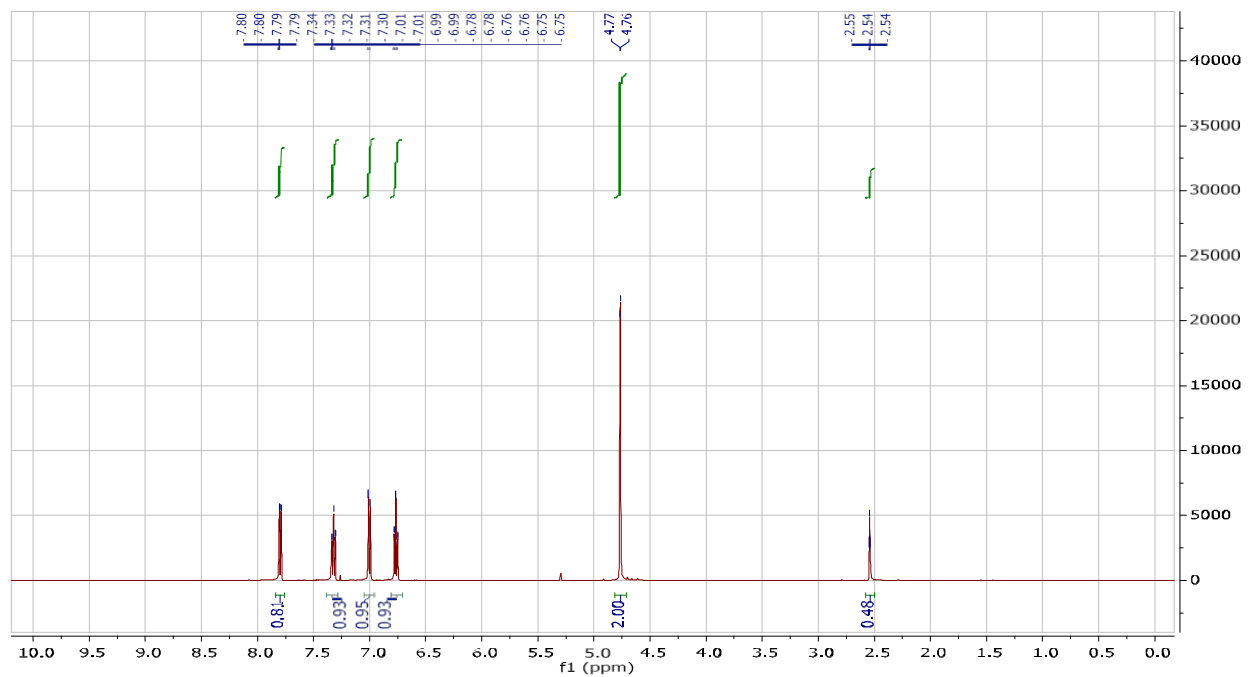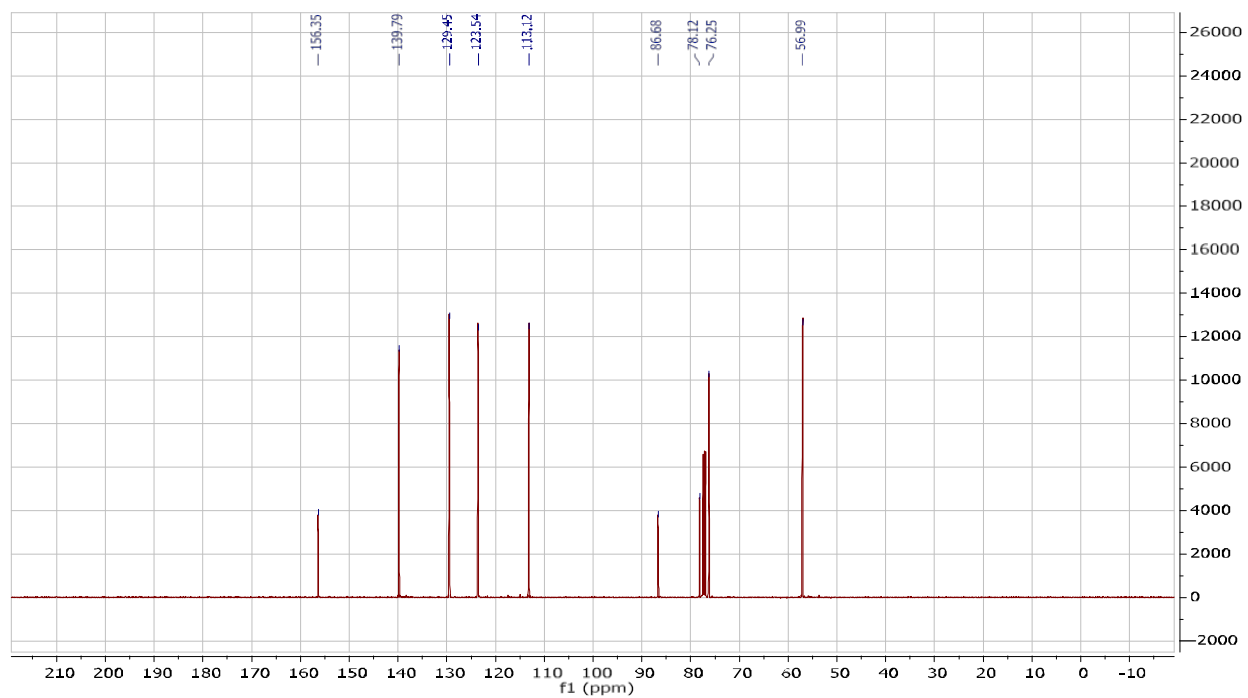

# <sup>1</sup>H and <sup>13</sup>C NMR spectra of 1a

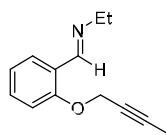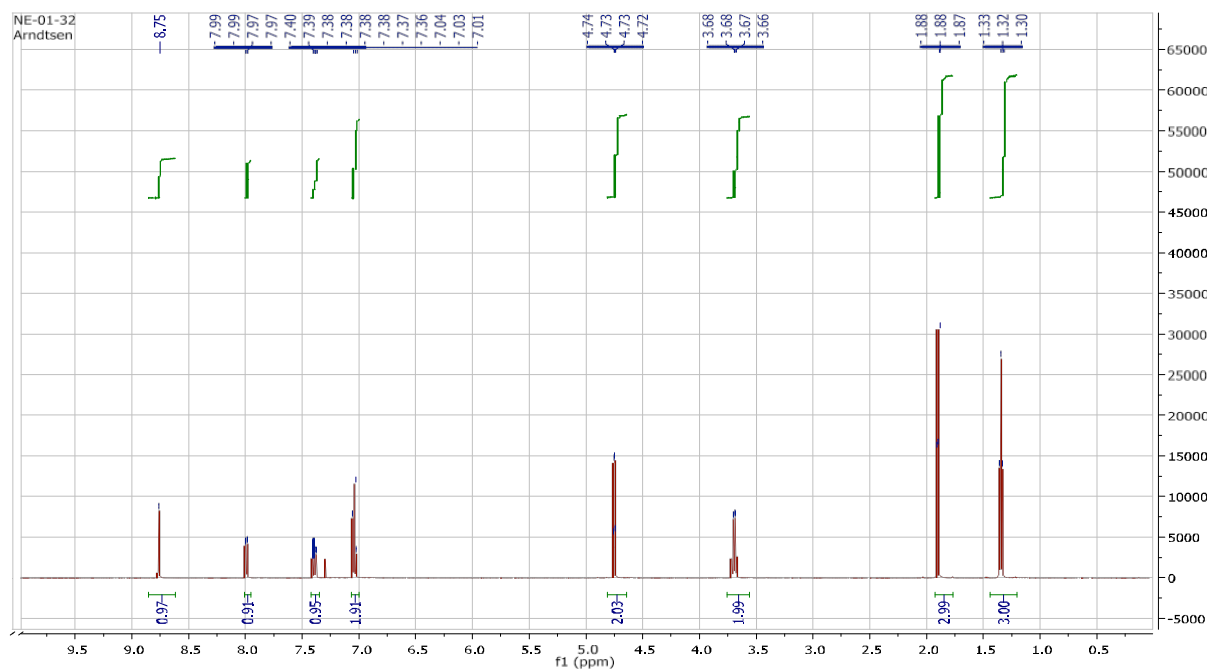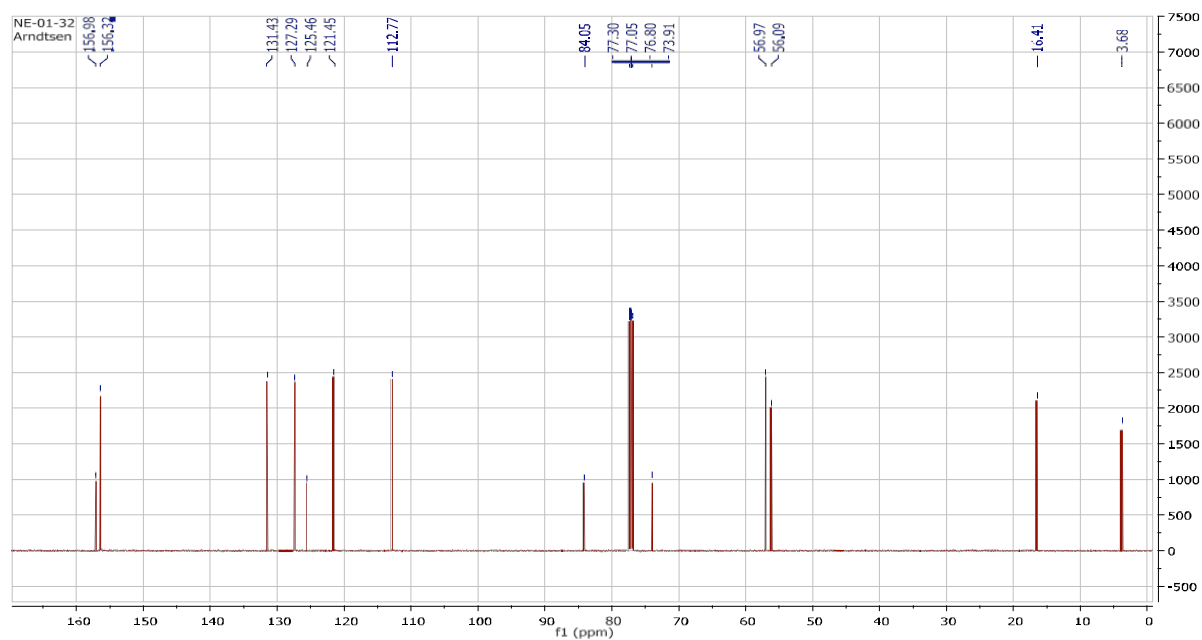

# <sup>1</sup>H and <sup>13</sup>C NMR spectra of 1b

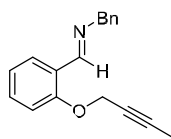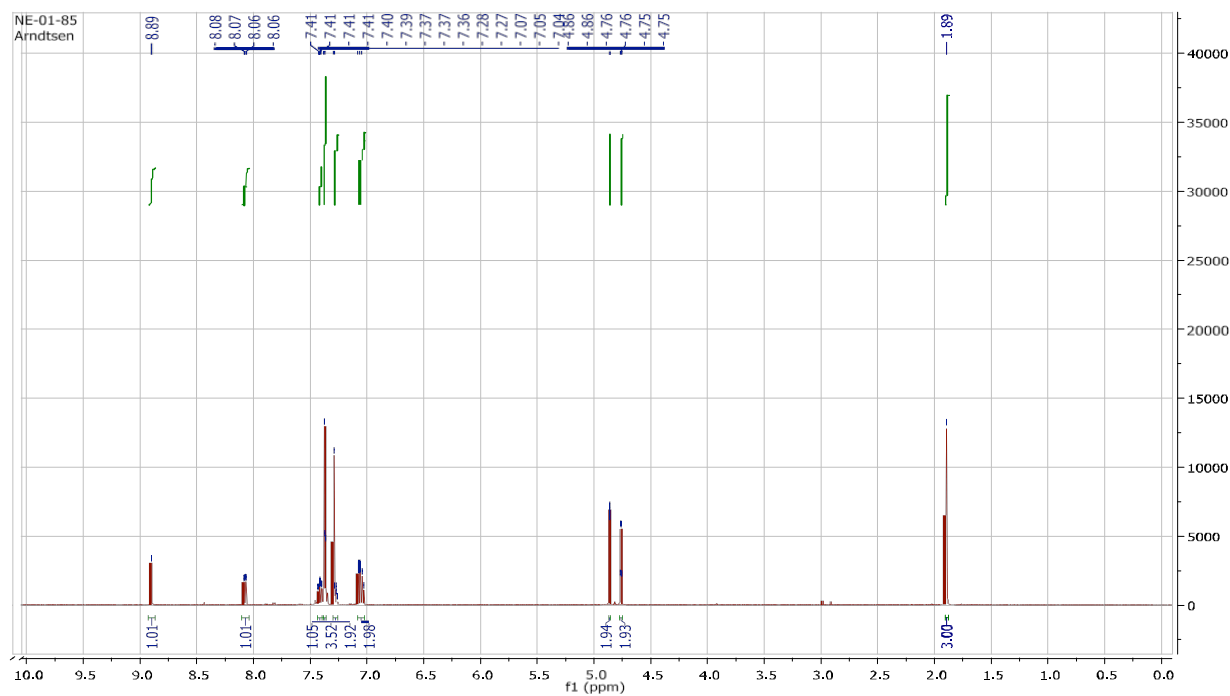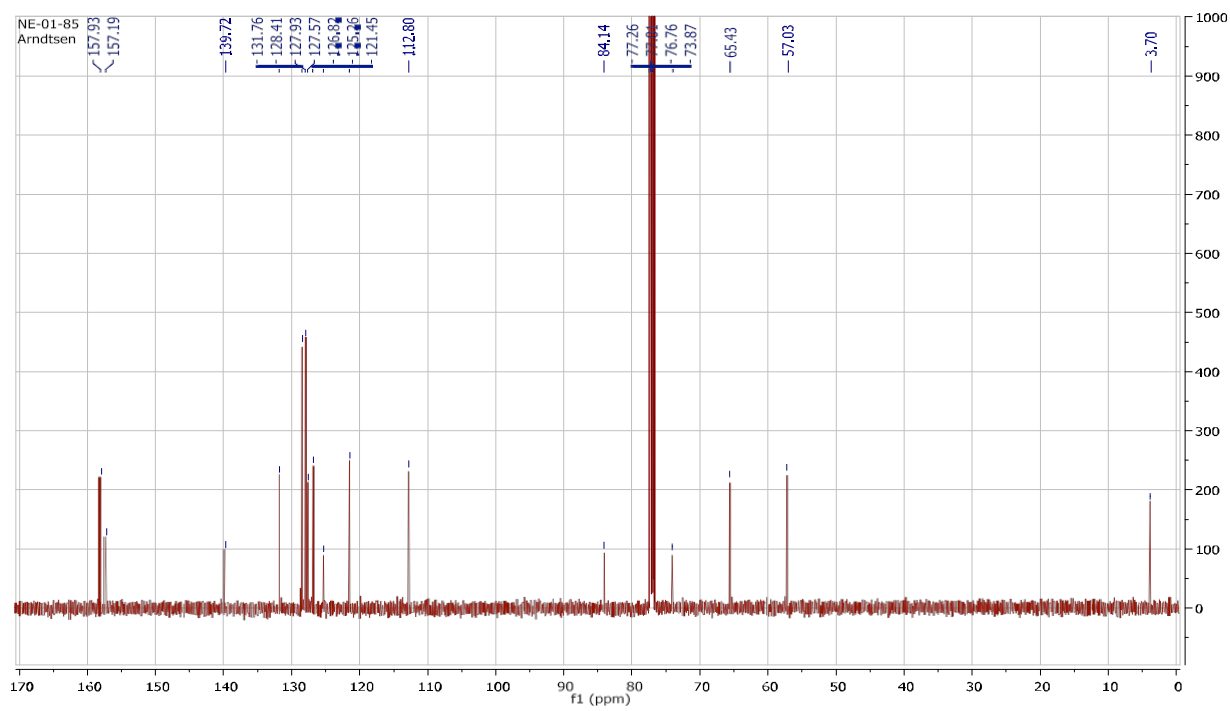

# <sup>1</sup>H and <sup>13</sup>C NMR spectra of 1c

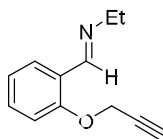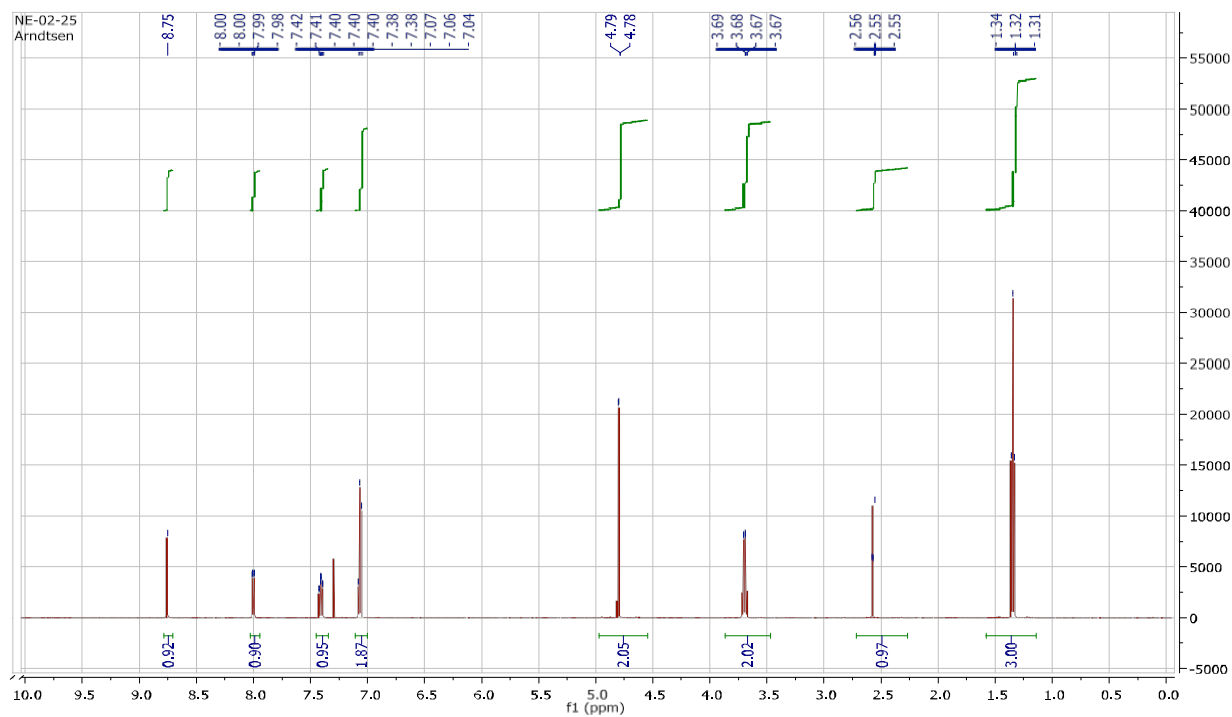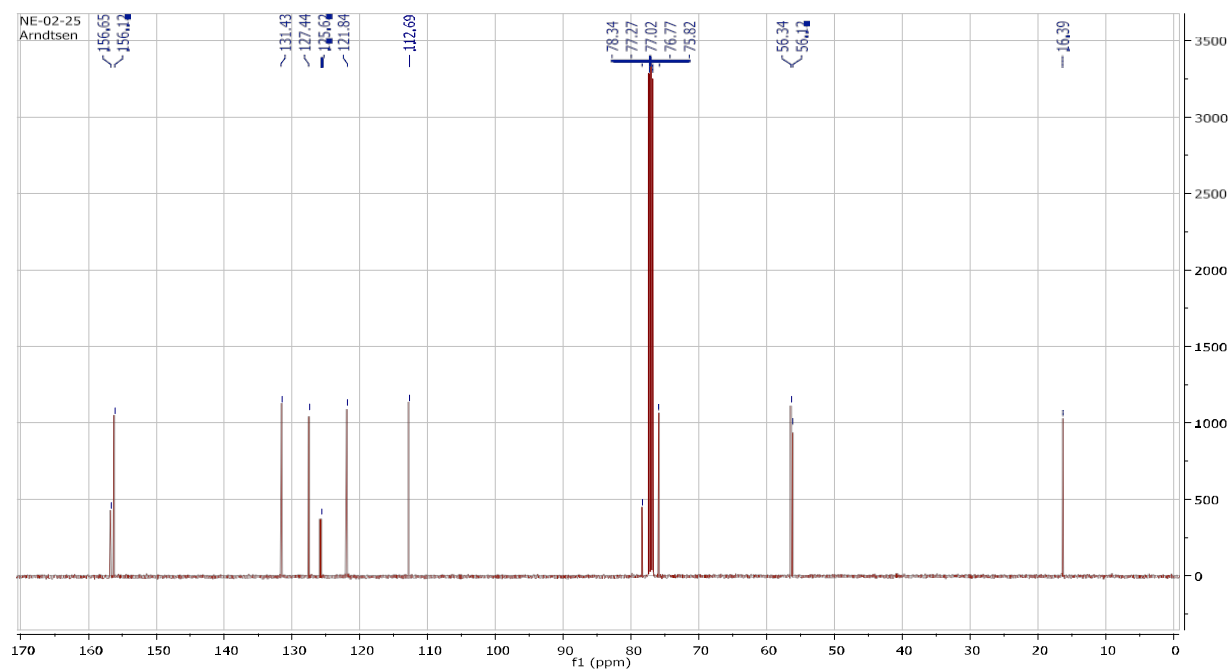

# <sup>1</sup>H and <sup>13</sup>C NMR spectra of 1d

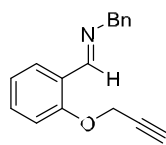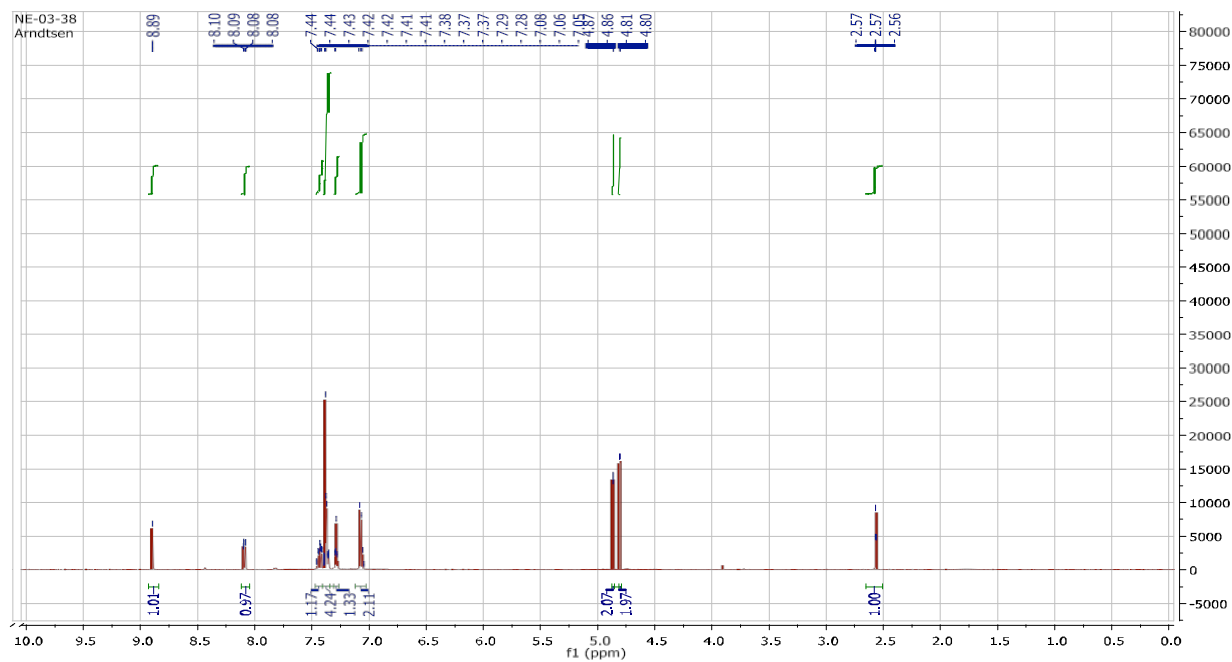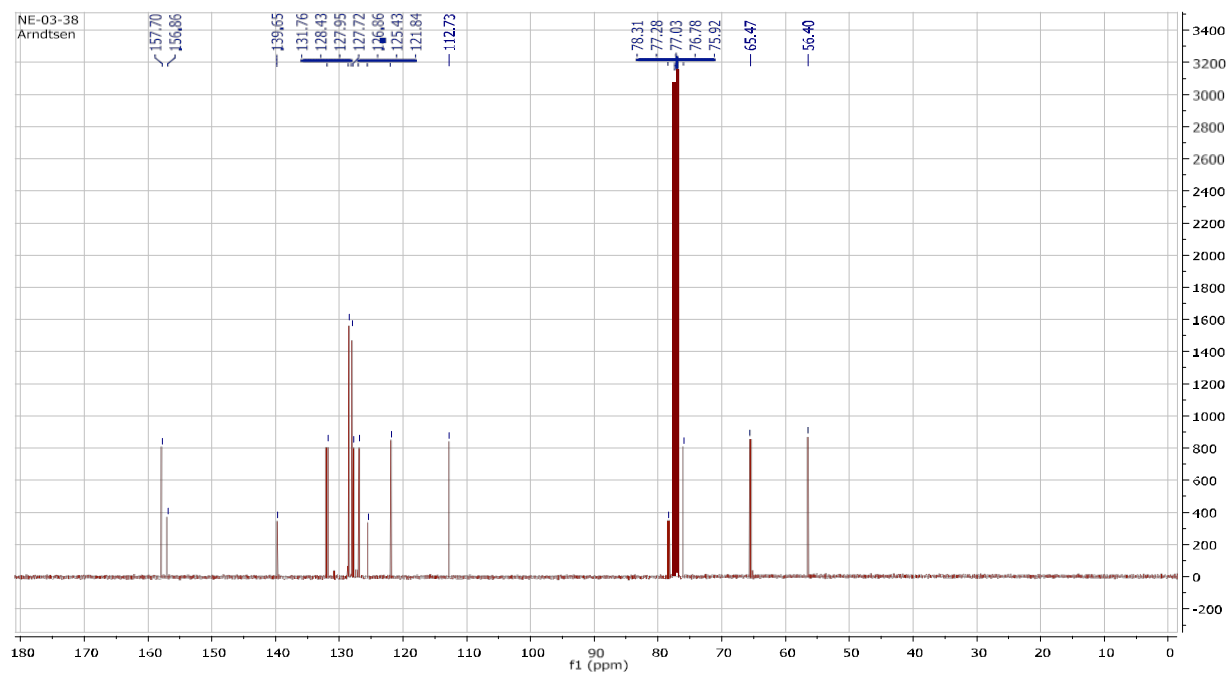



# <sup>1</sup>H and <sup>13</sup>C NMR spectra of 1e

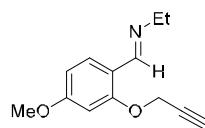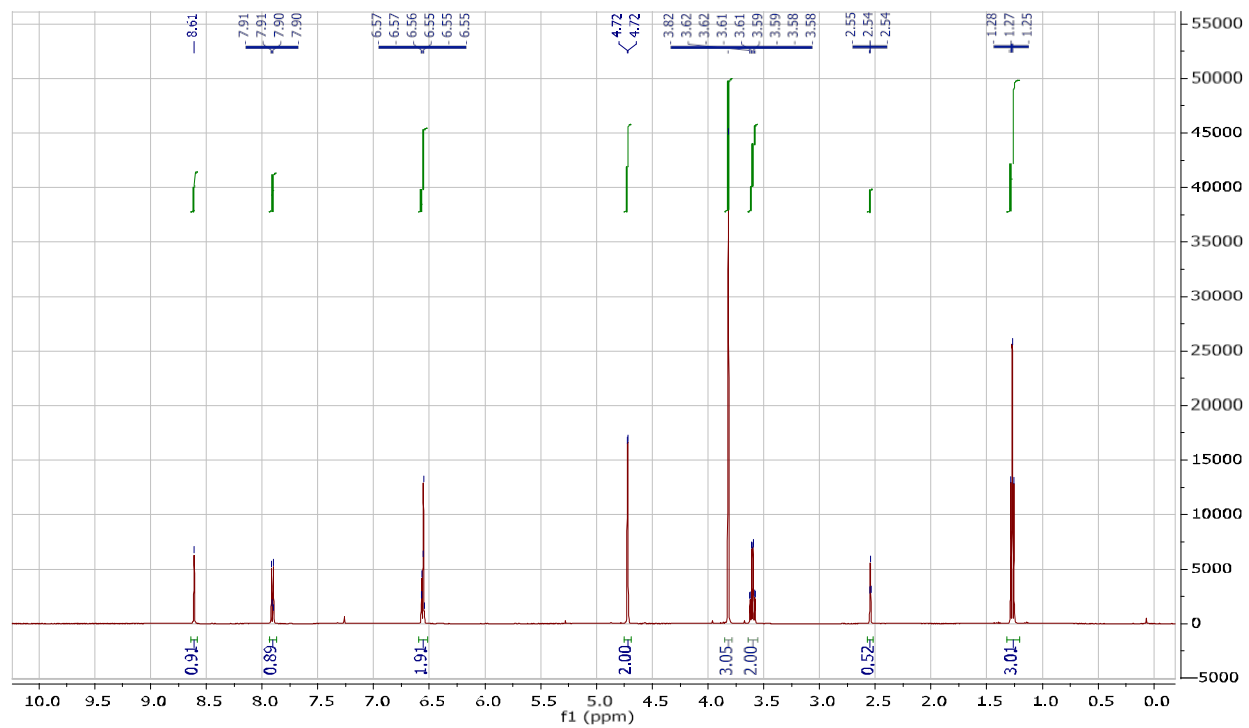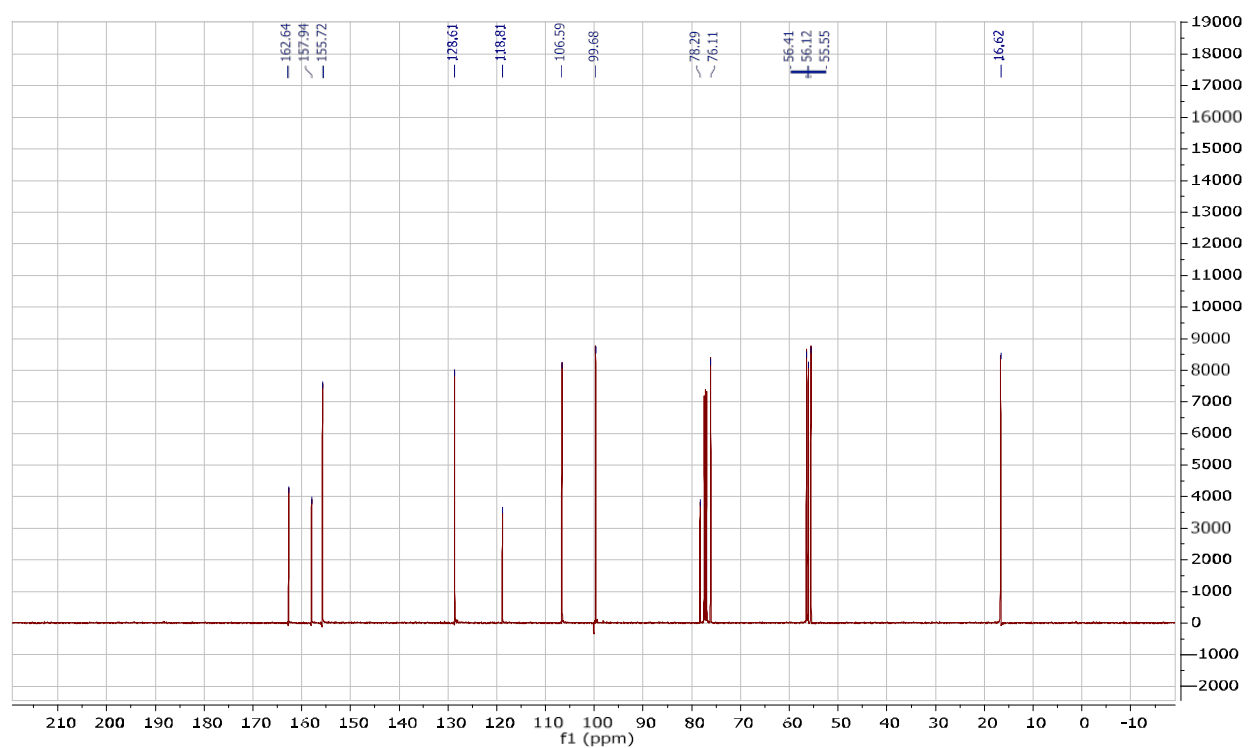

# <sup>1</sup>H and <sup>13</sup>C NMR spectra of 3a

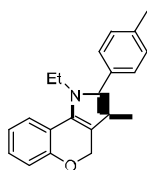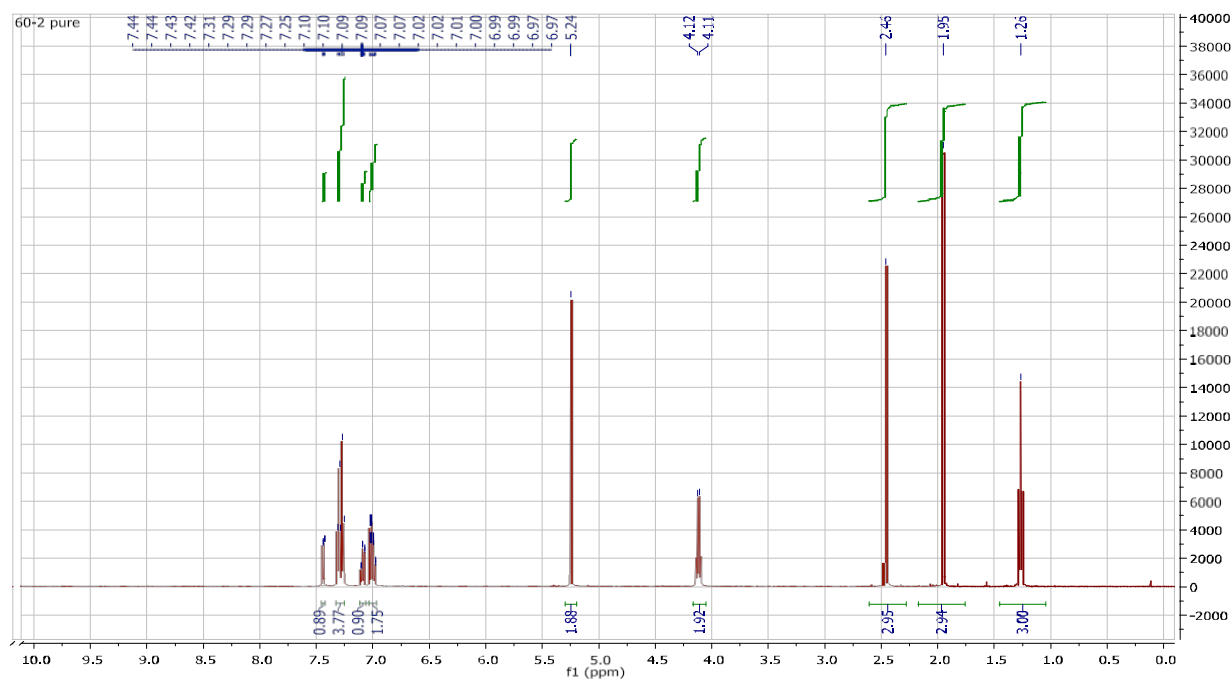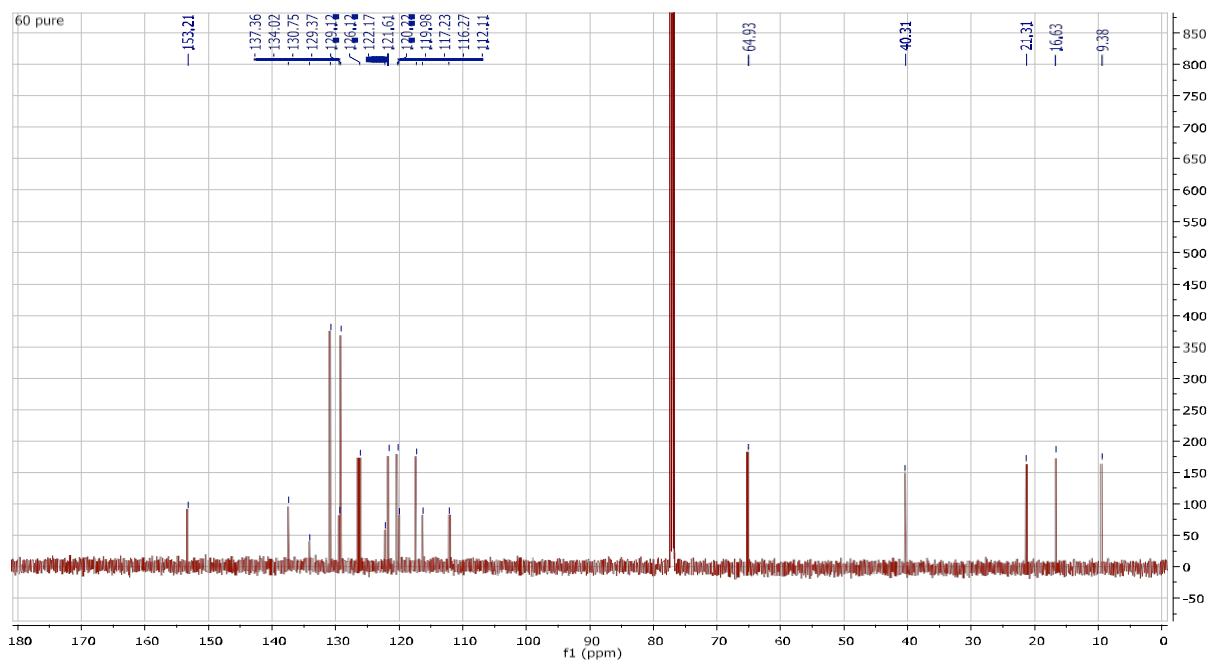

# <sup>1</sup>H and <sup>13</sup>C NMR spectra of 3b

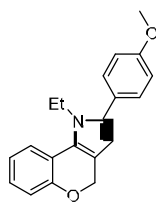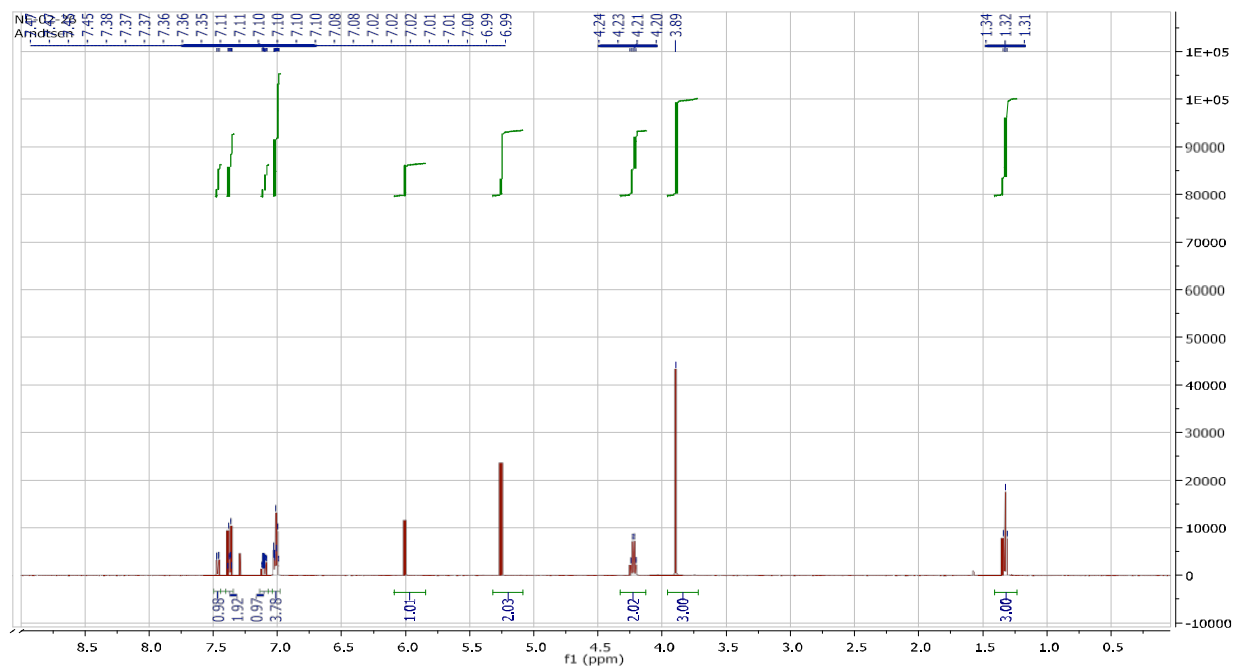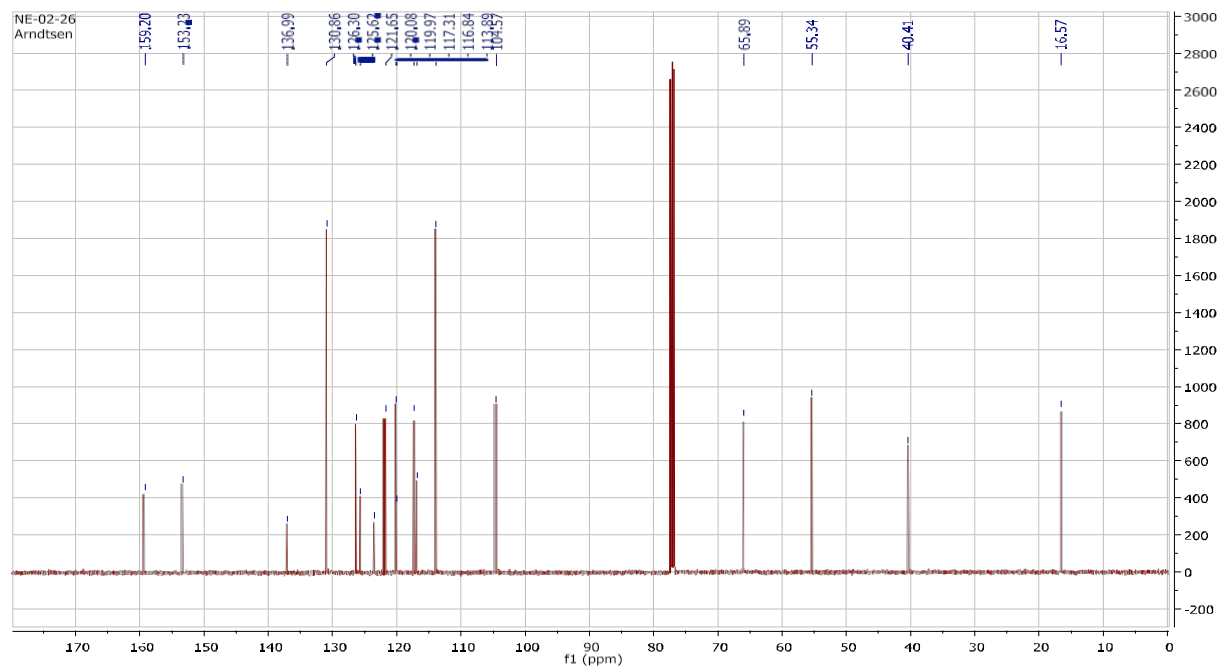

# <sup>1</sup>H and <sup>13</sup>C NMR spectra of 3c

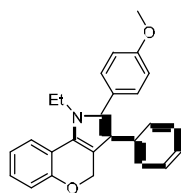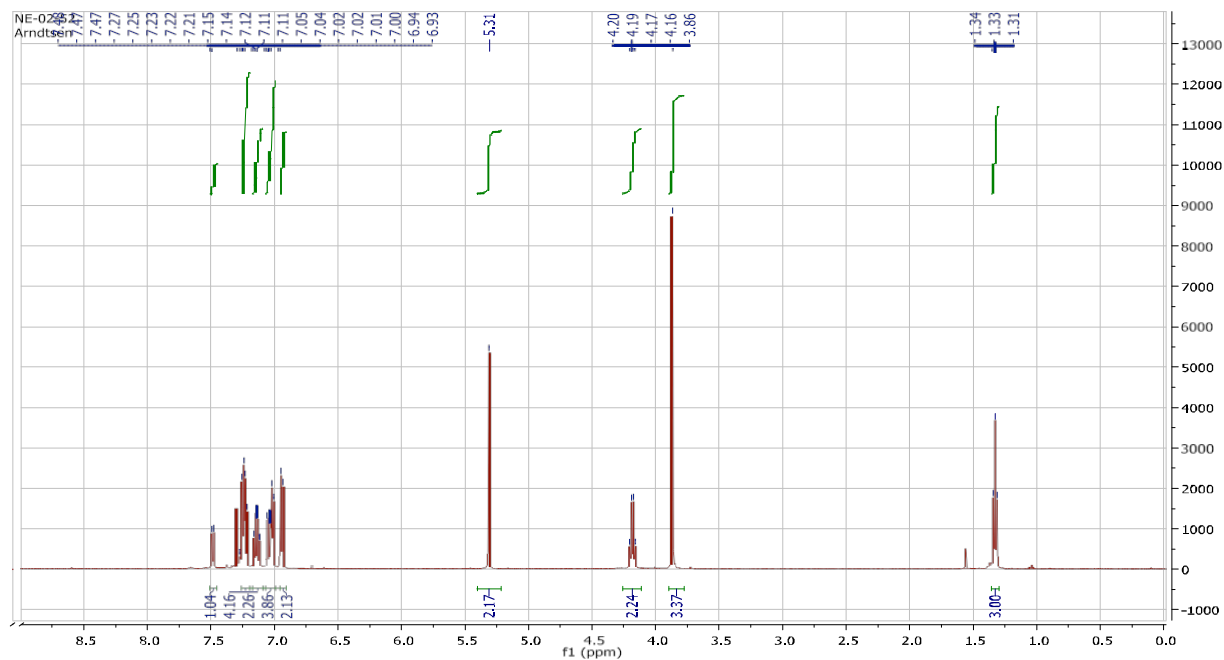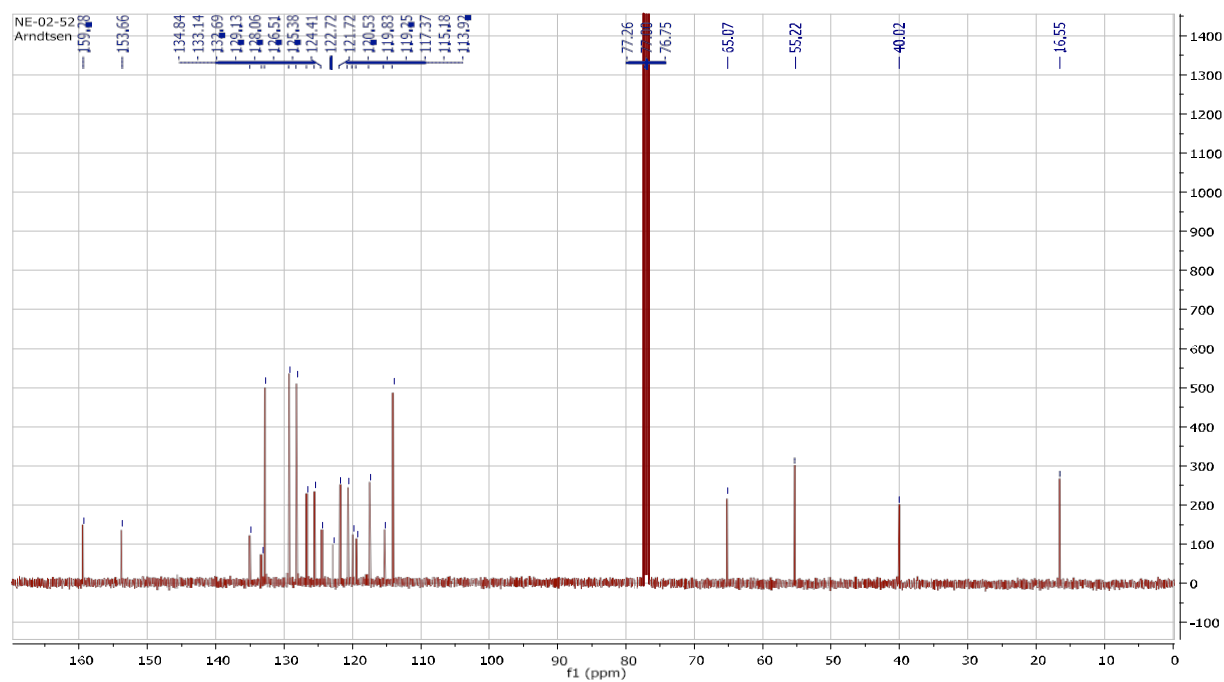

# $^1\text{H}$ and $^{13}\text{C}$ NMR spectra of 3d

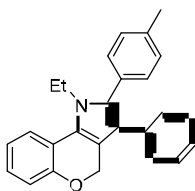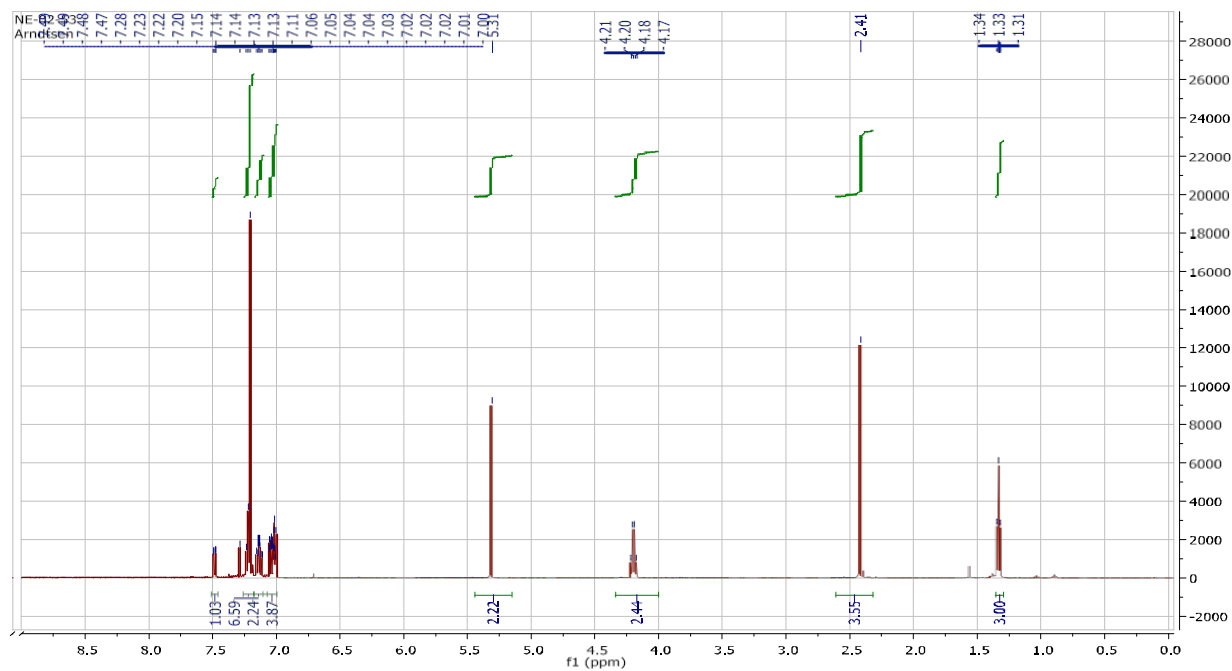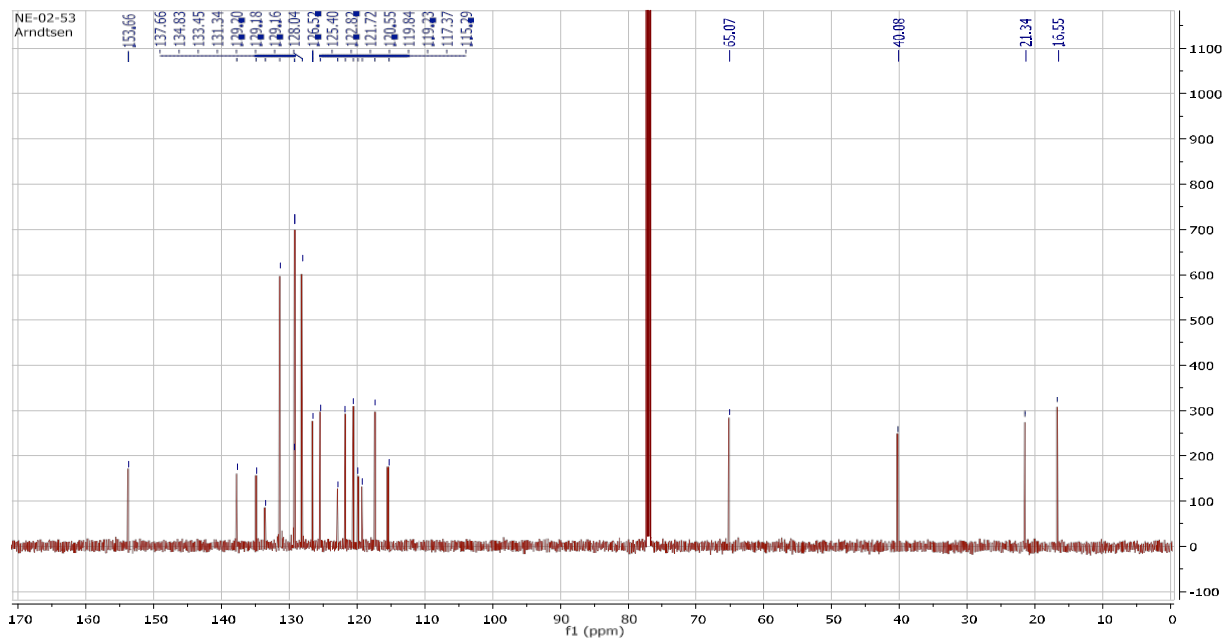

# <sup>1</sup>H and <sup>13</sup>C NMR spectra of 3e

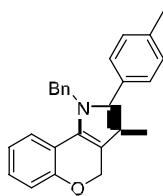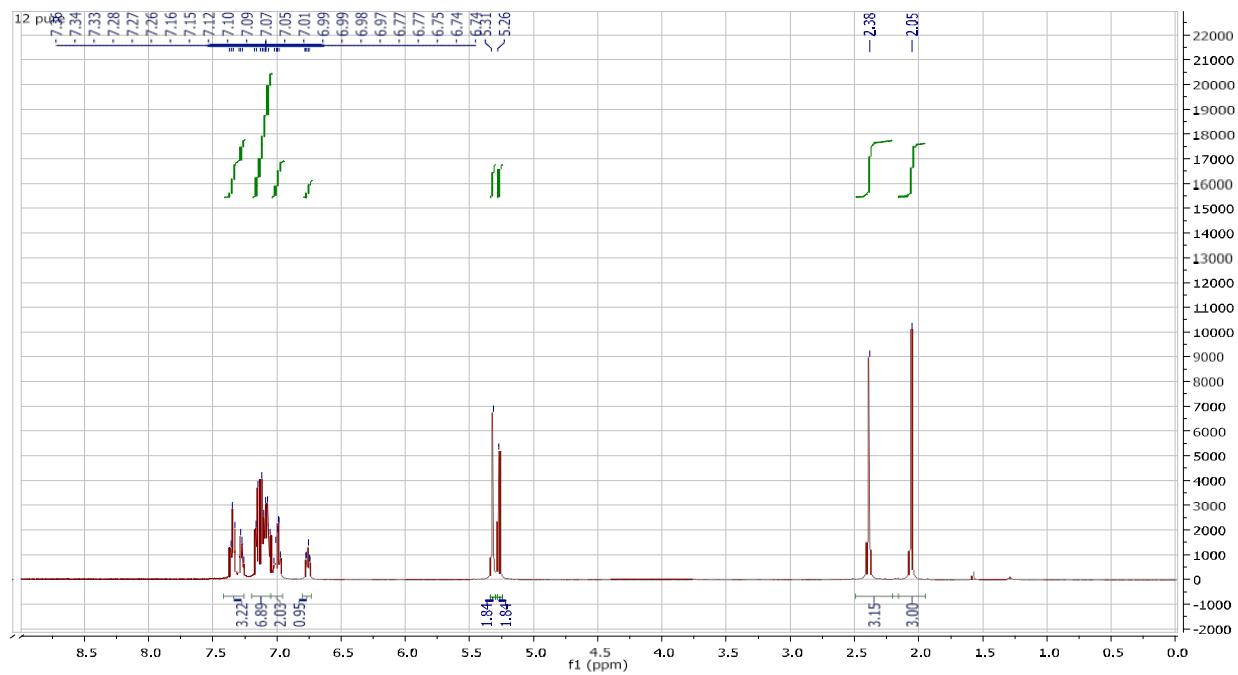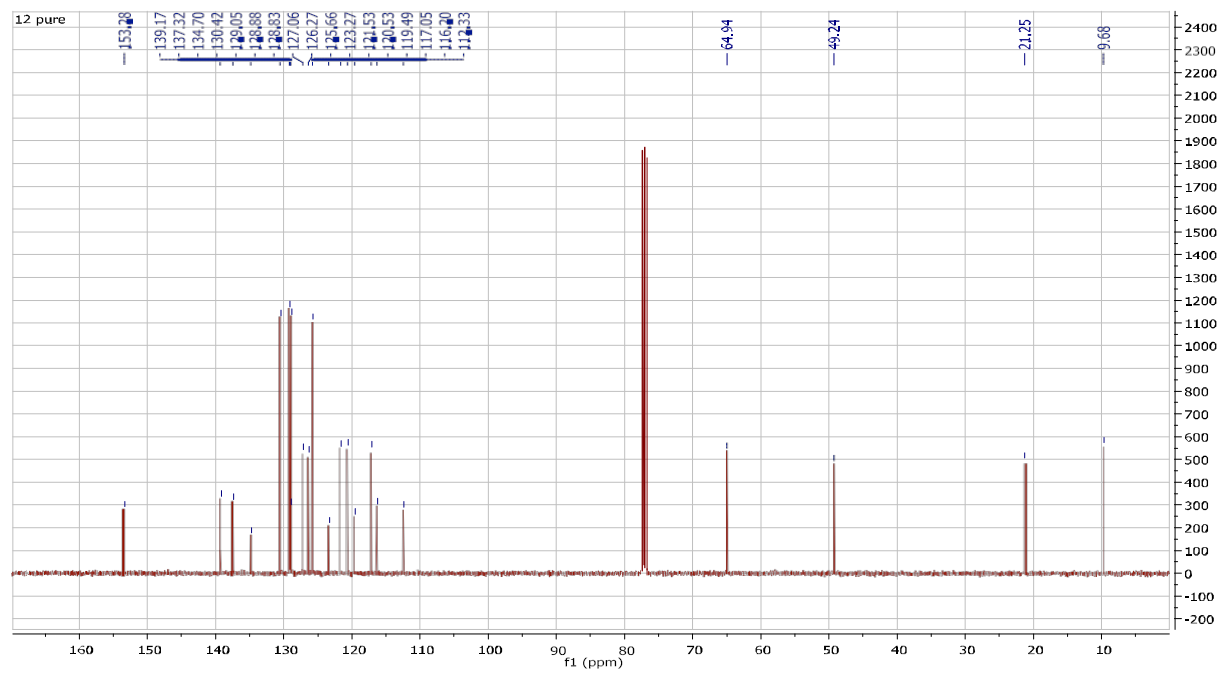

# <sup>1</sup>H and <sup>13</sup>C NMR spectra of 3f

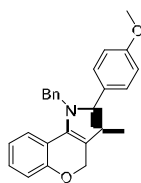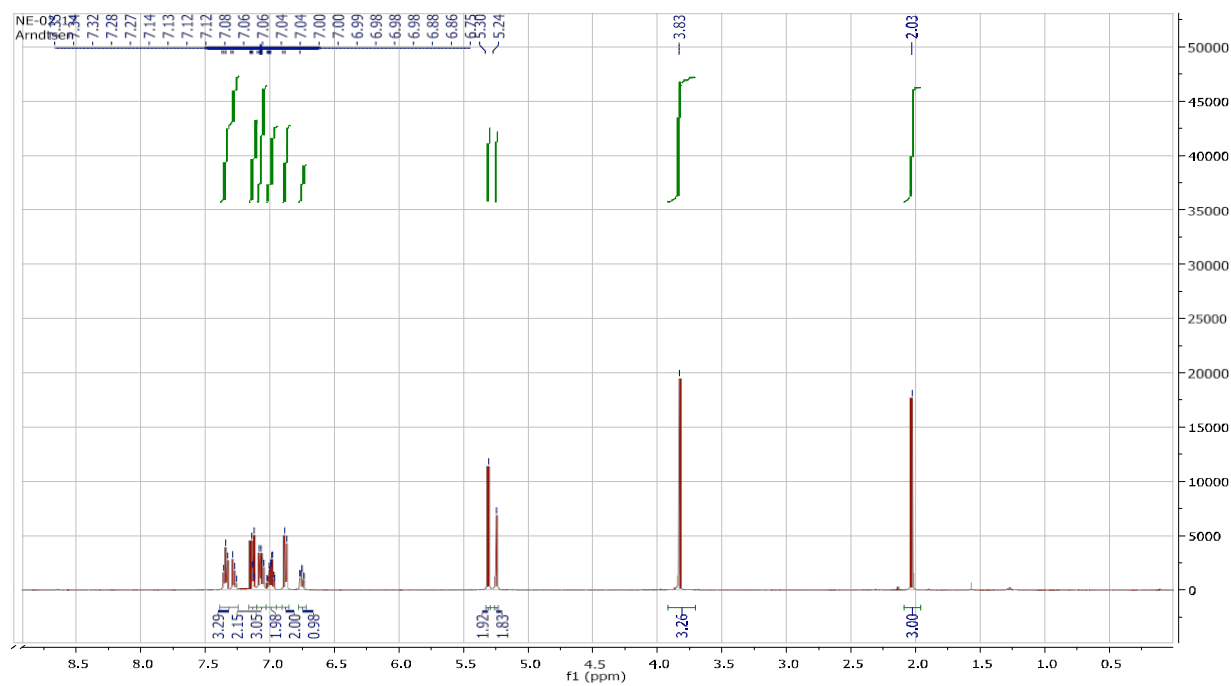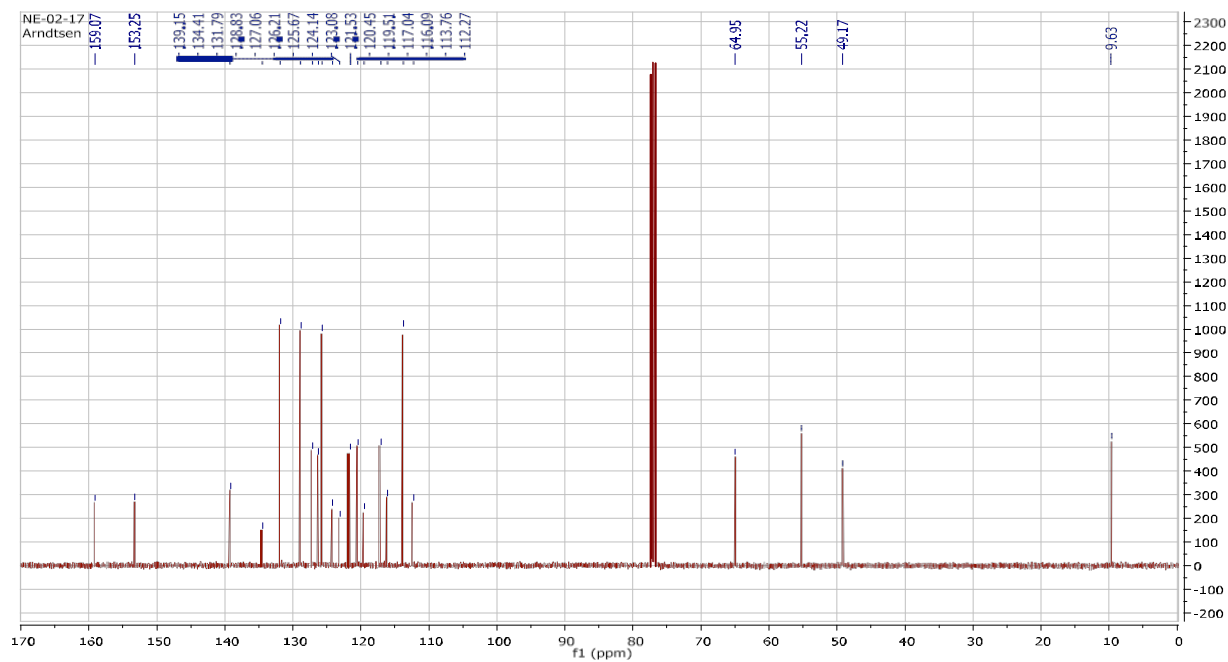

# <sup>1</sup>H and <sup>13</sup>C NMR spectra of 3g

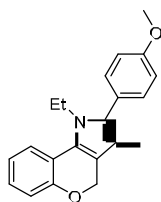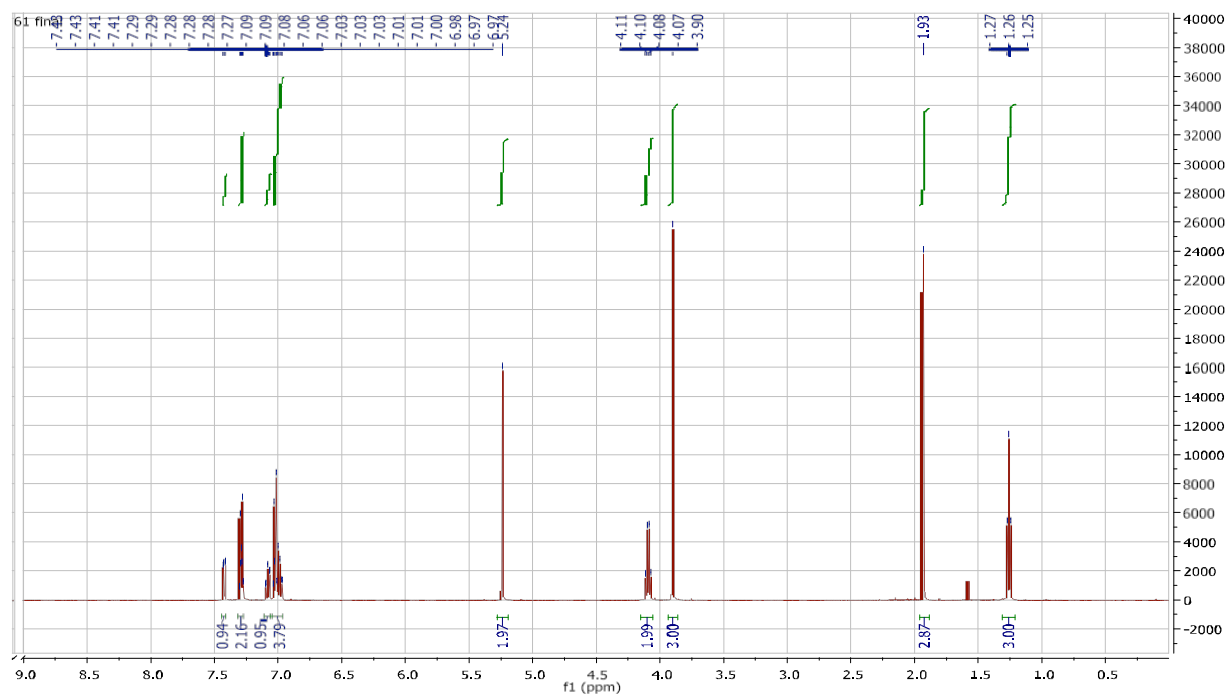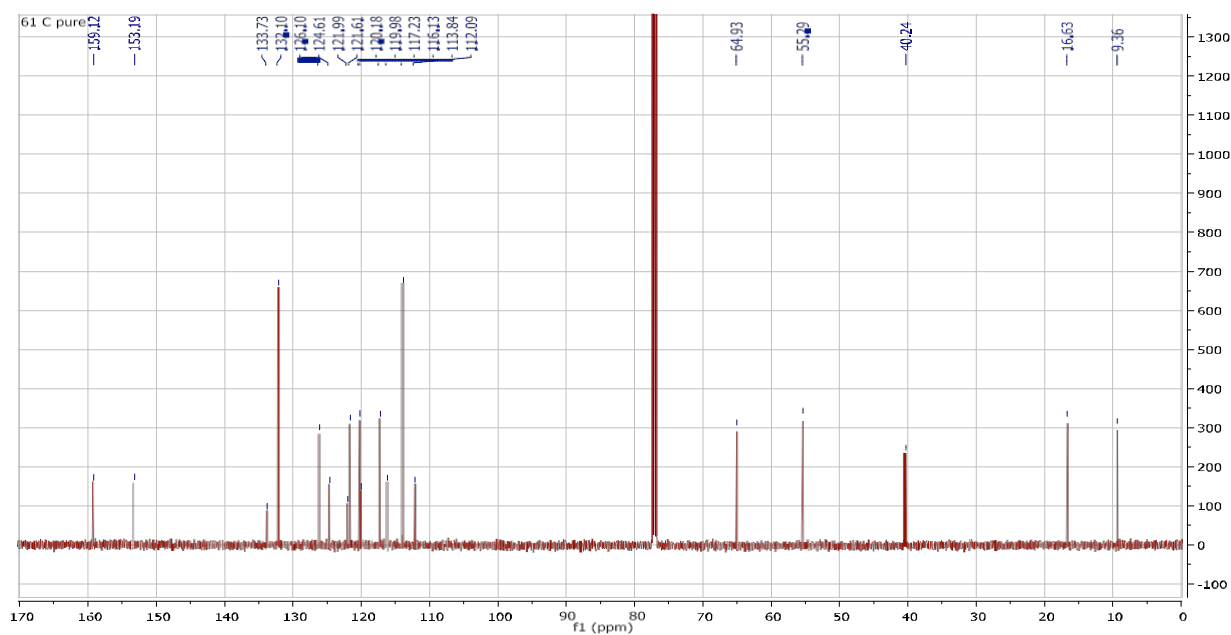



# $^1\text{H}$ and $^{13}\text{C}$ NMR spectra of 3h

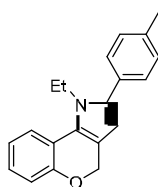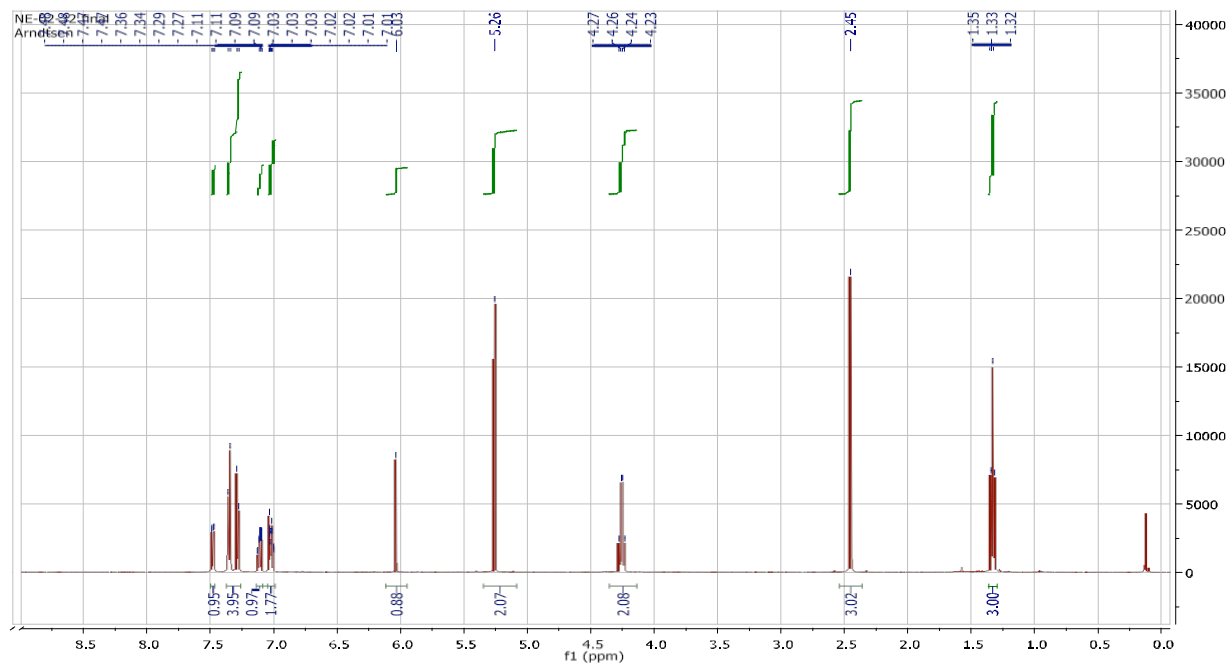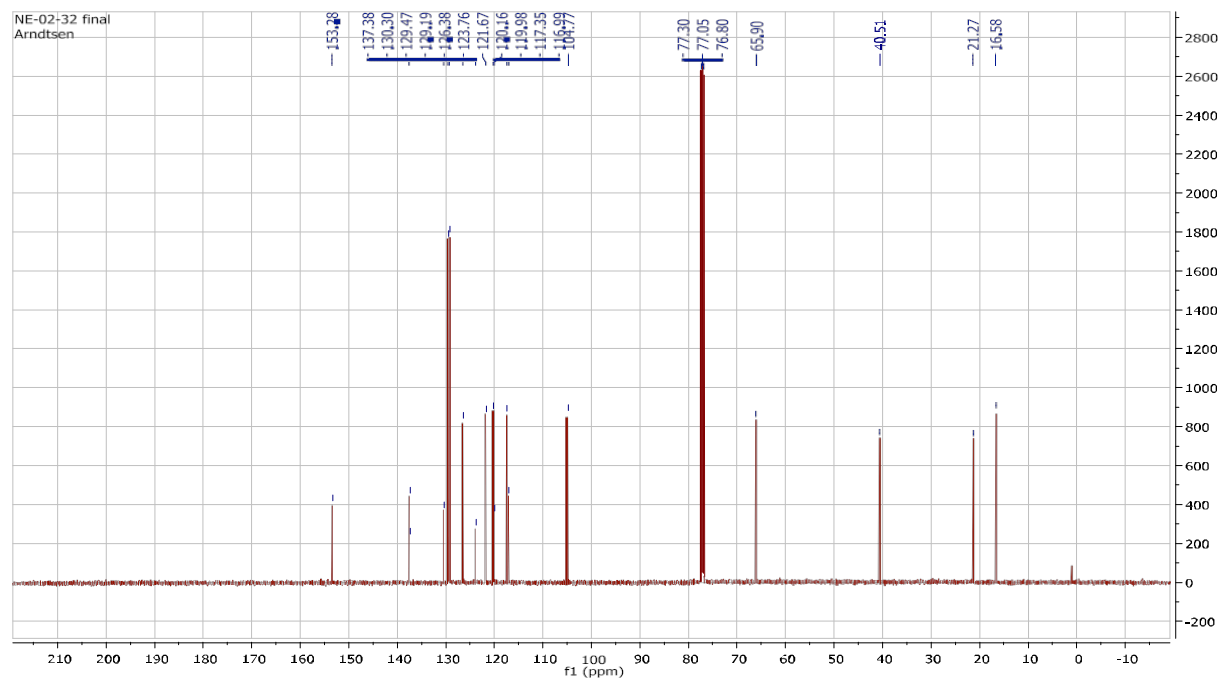

# $^1\text{H}$ and $^{13}\text{C}$ NMR spectra of 3i

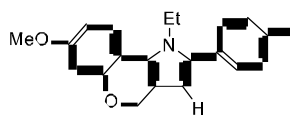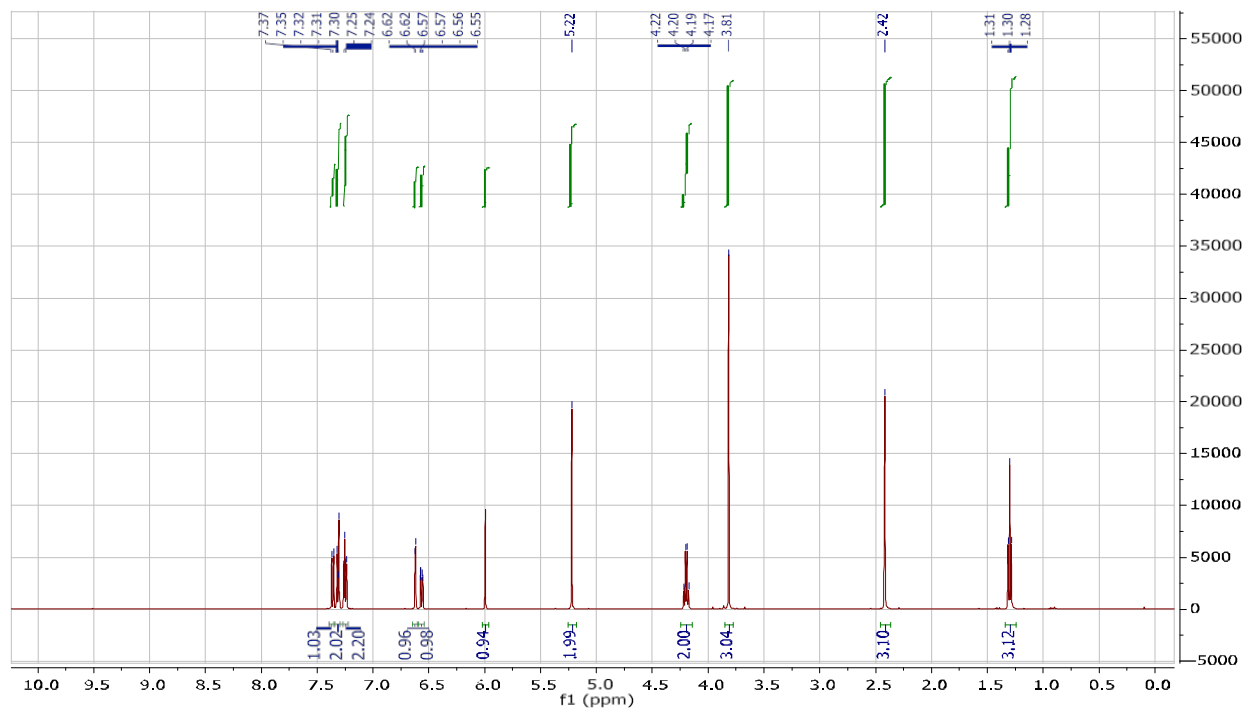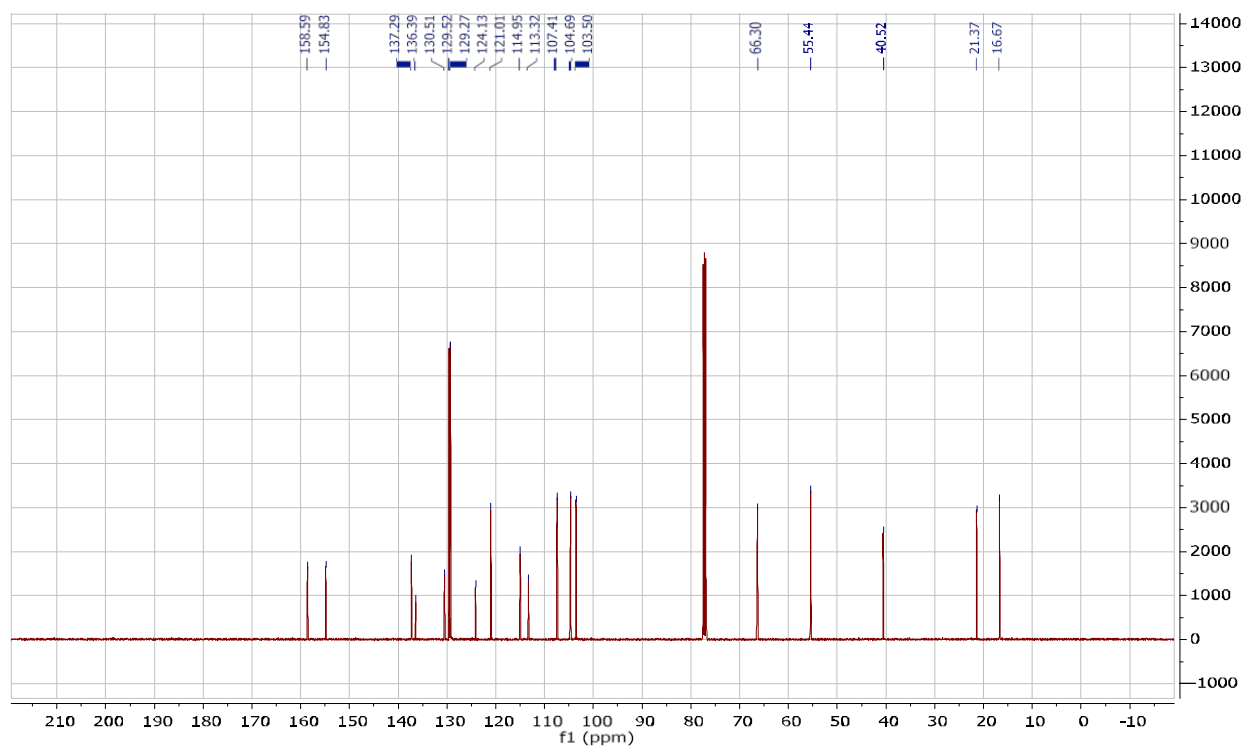

# <sup>1</sup>H and <sup>13</sup>C NMR spectra of 3j

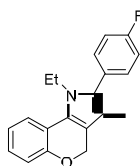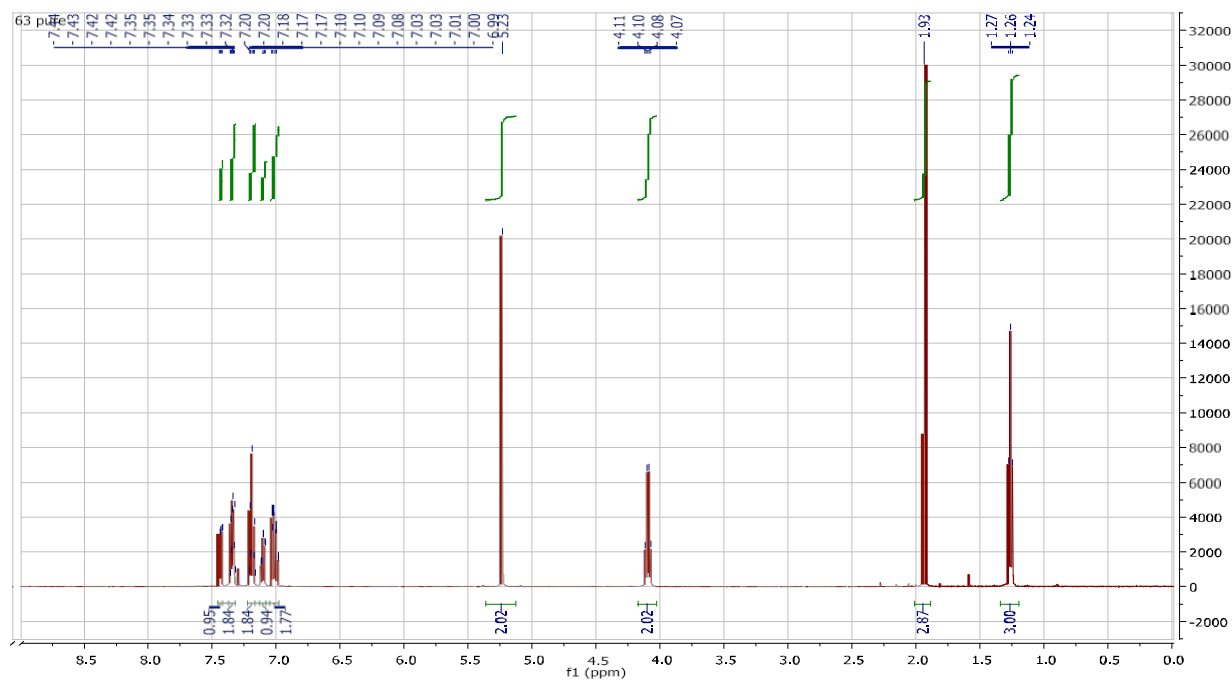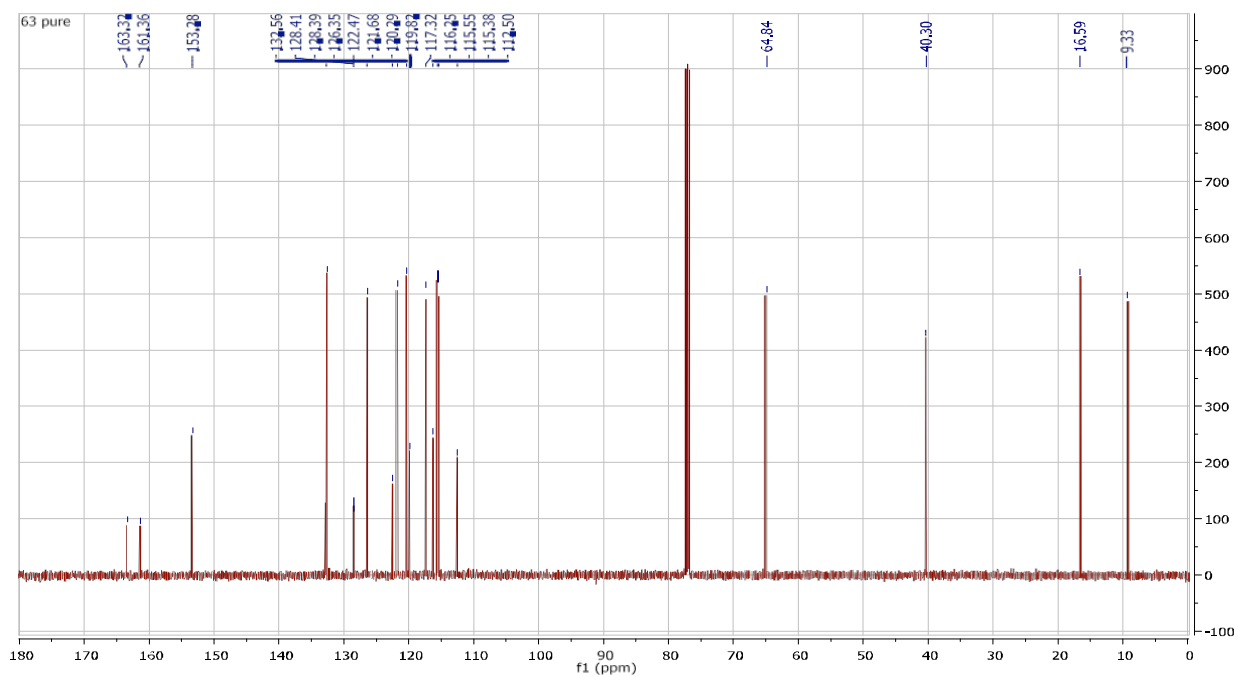

# <sup>1</sup>H and <sup>13</sup>C NMR spectra of 3k

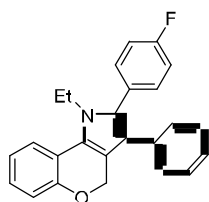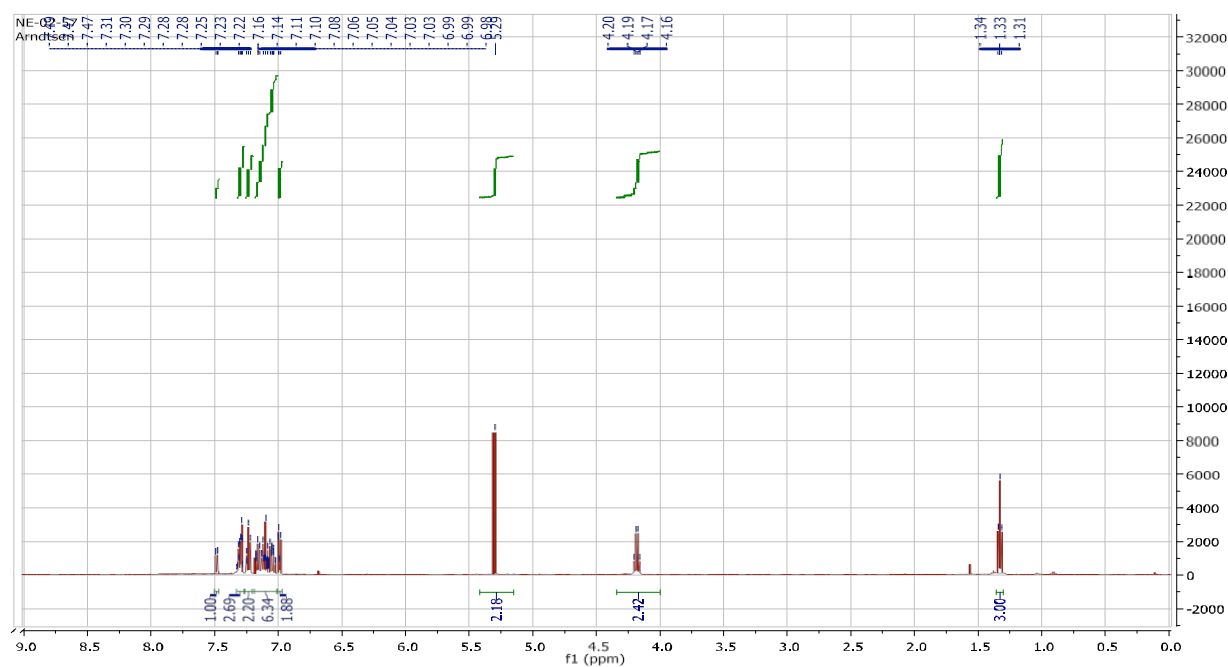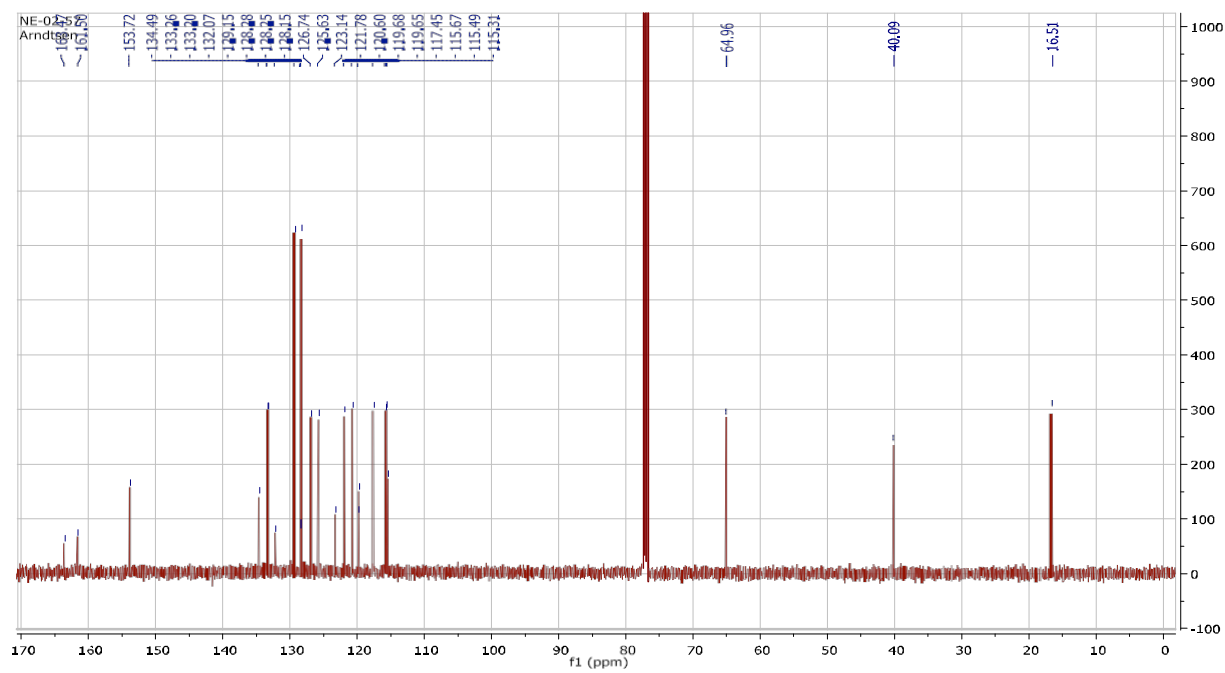

# <sup>1</sup>H and <sup>13</sup>C NMR spectra of 3l

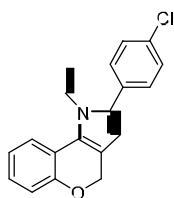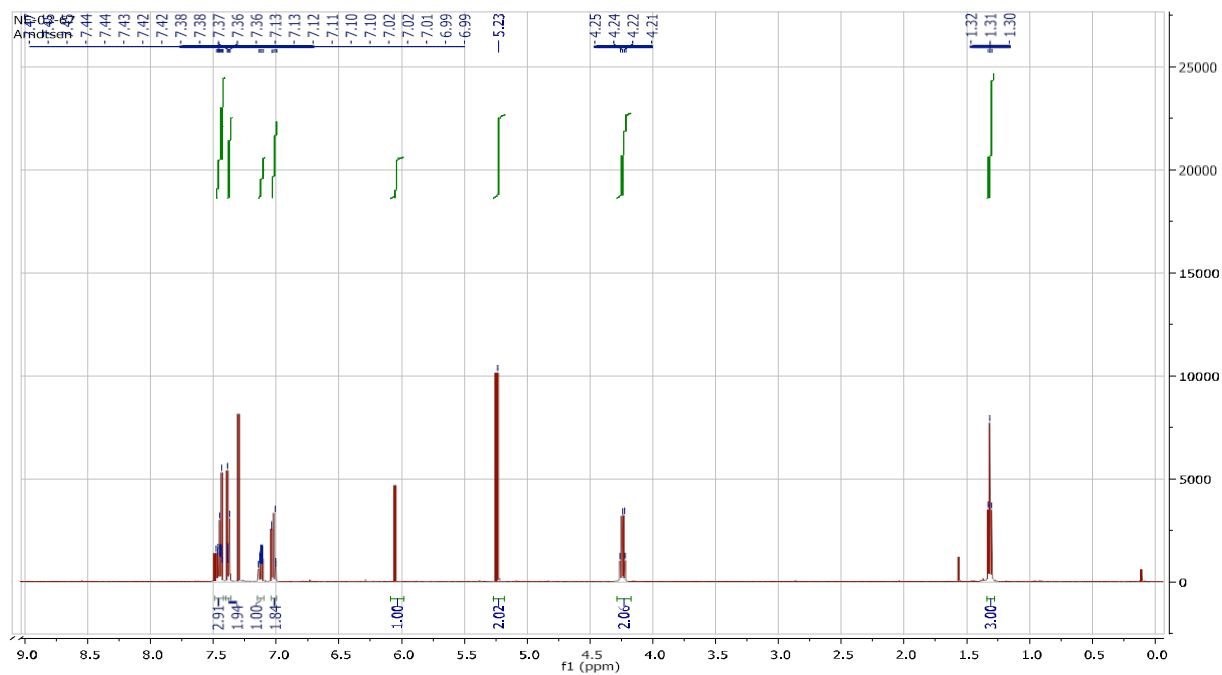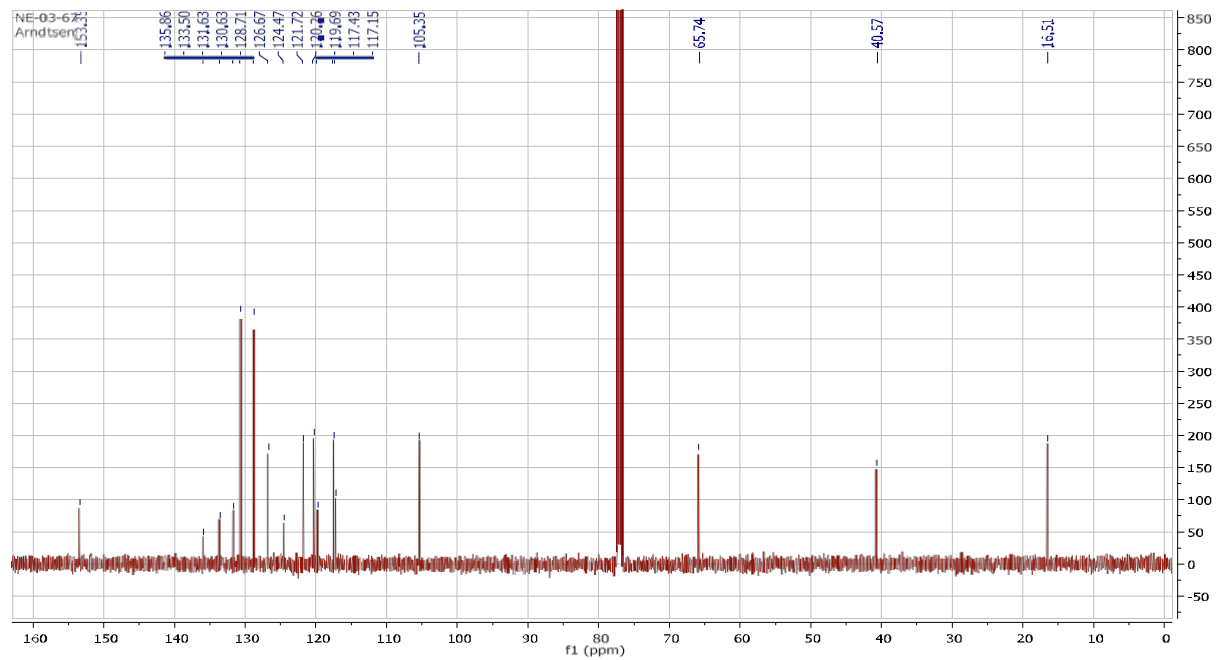

# <sup>1</sup>H and <sup>13</sup>C NMR spectra of 3m

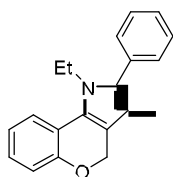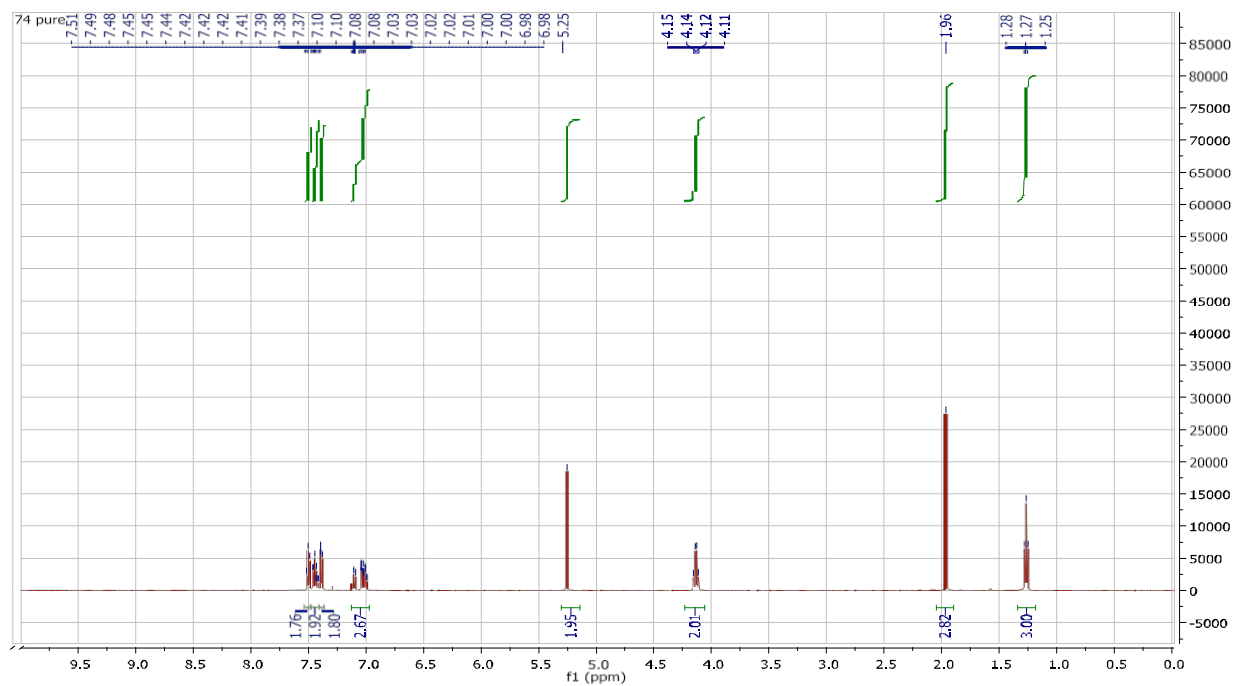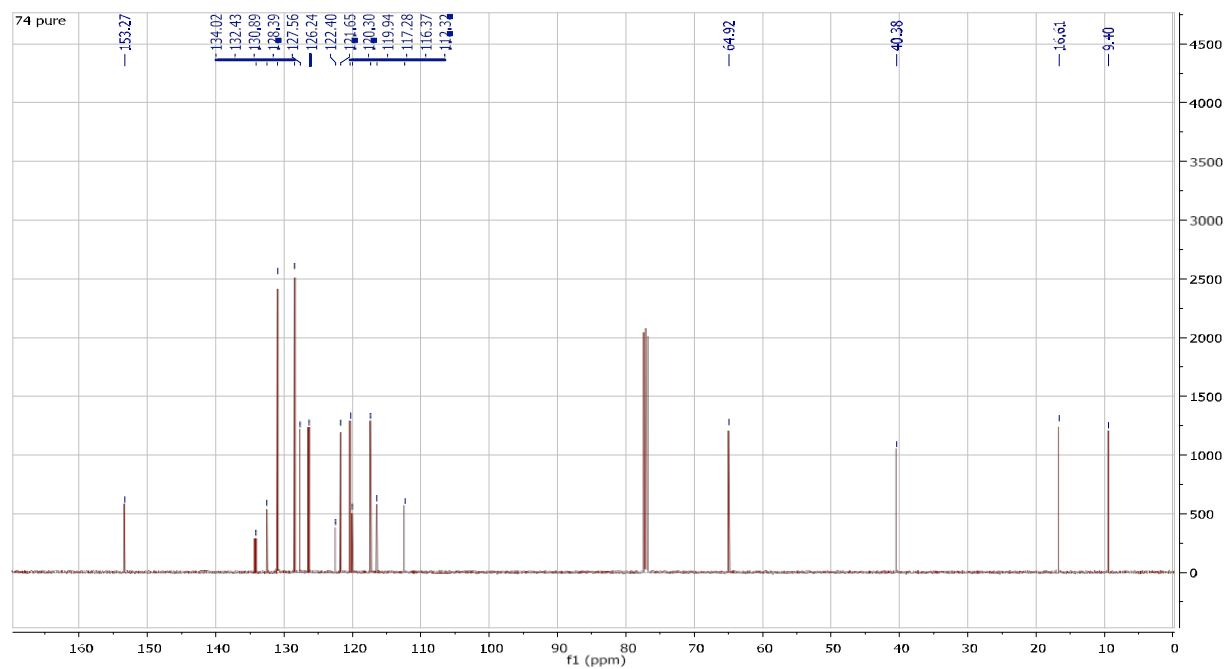

### $^1\text{H}$ and $^{13}\text{C}$ NMR spectra of 3n

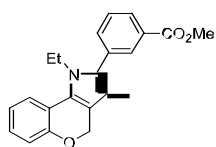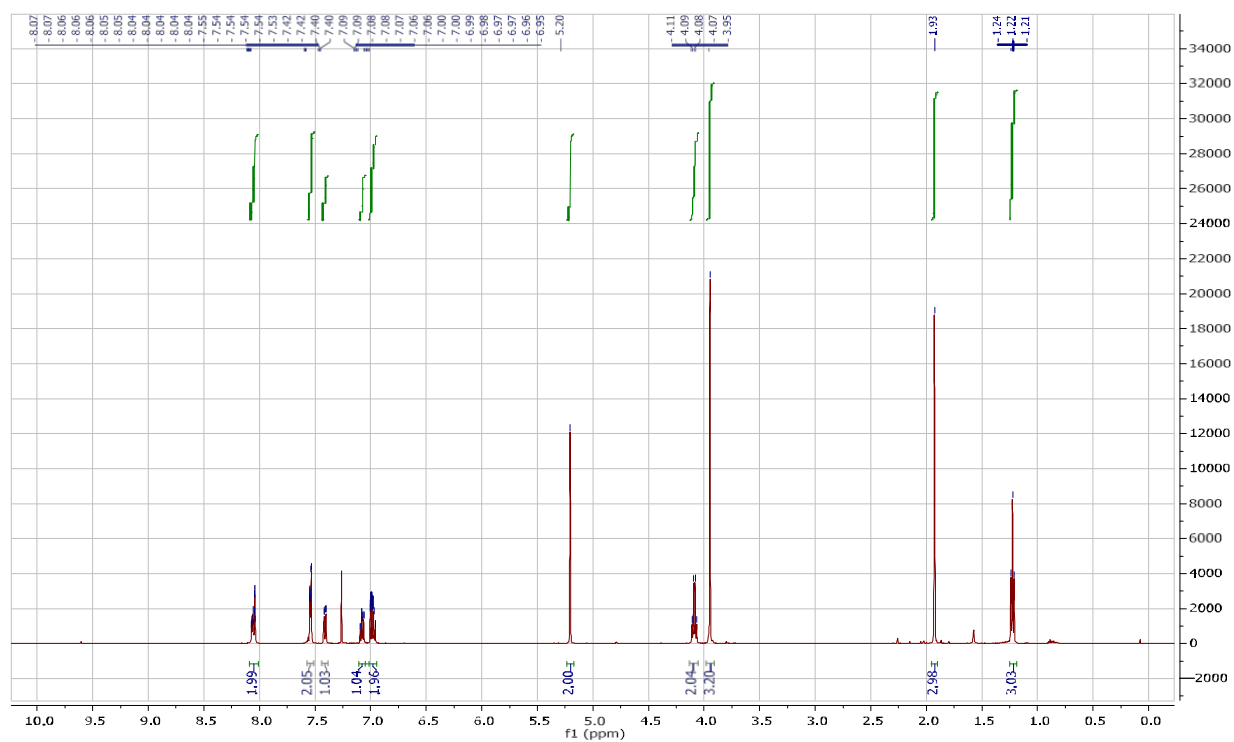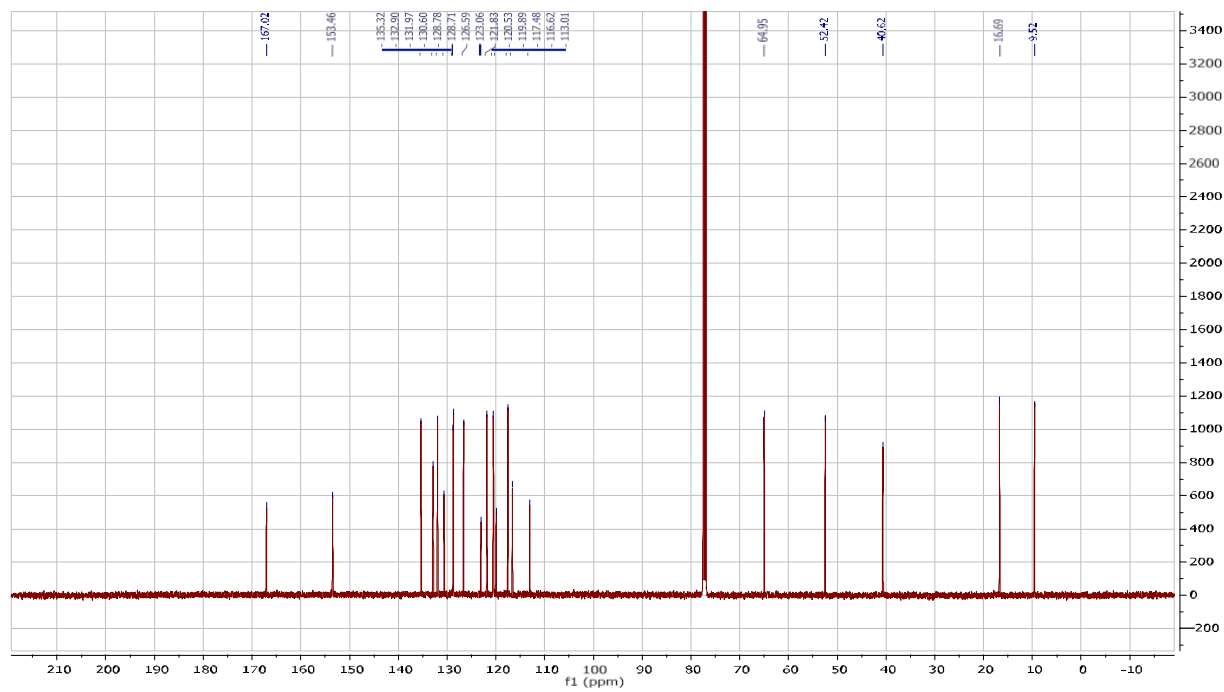

# <sup>1</sup>H and <sup>13</sup>C NMR spectra of 3o

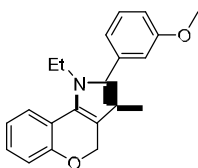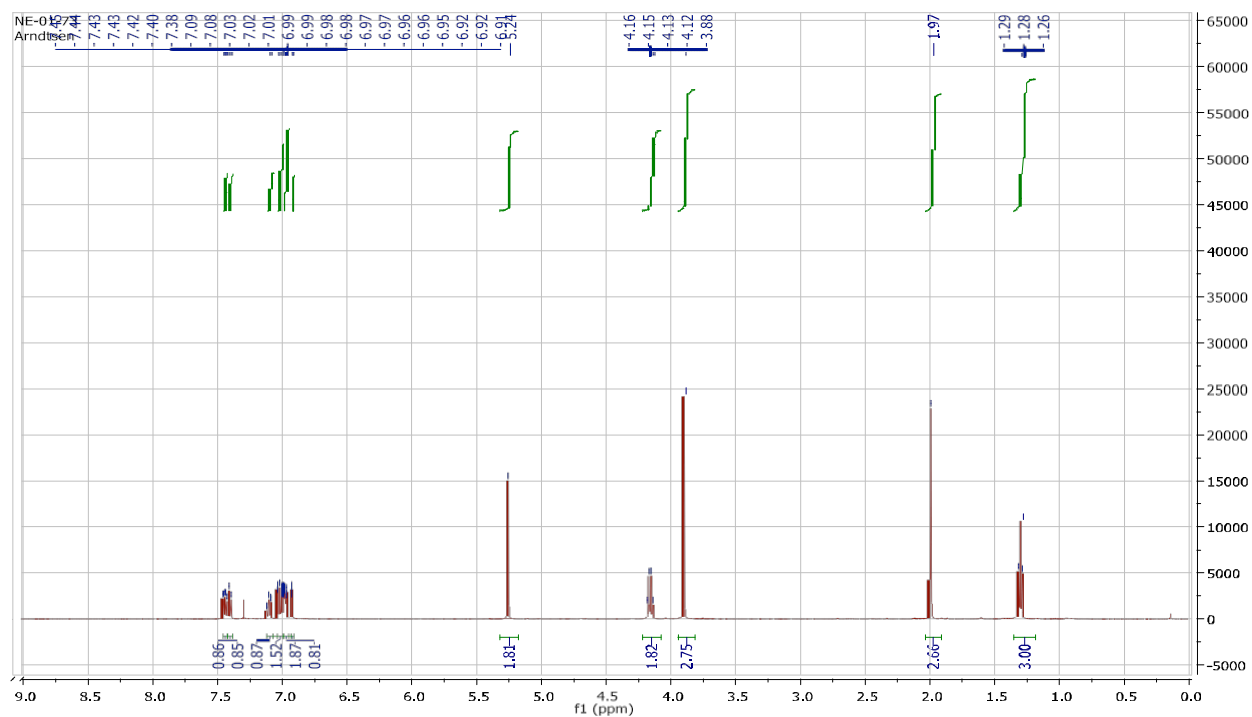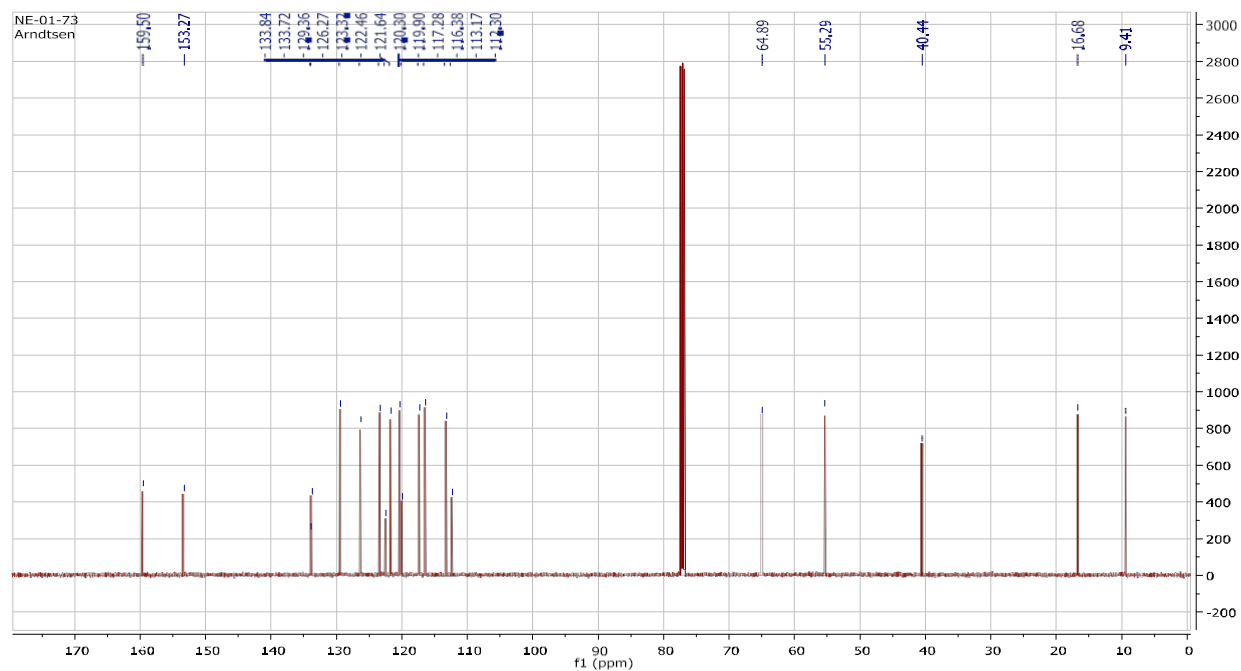



# $^1\text{H}$ and $^{13}\text{C}$ NMR spectra of 3p

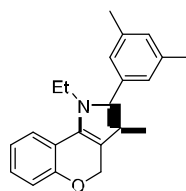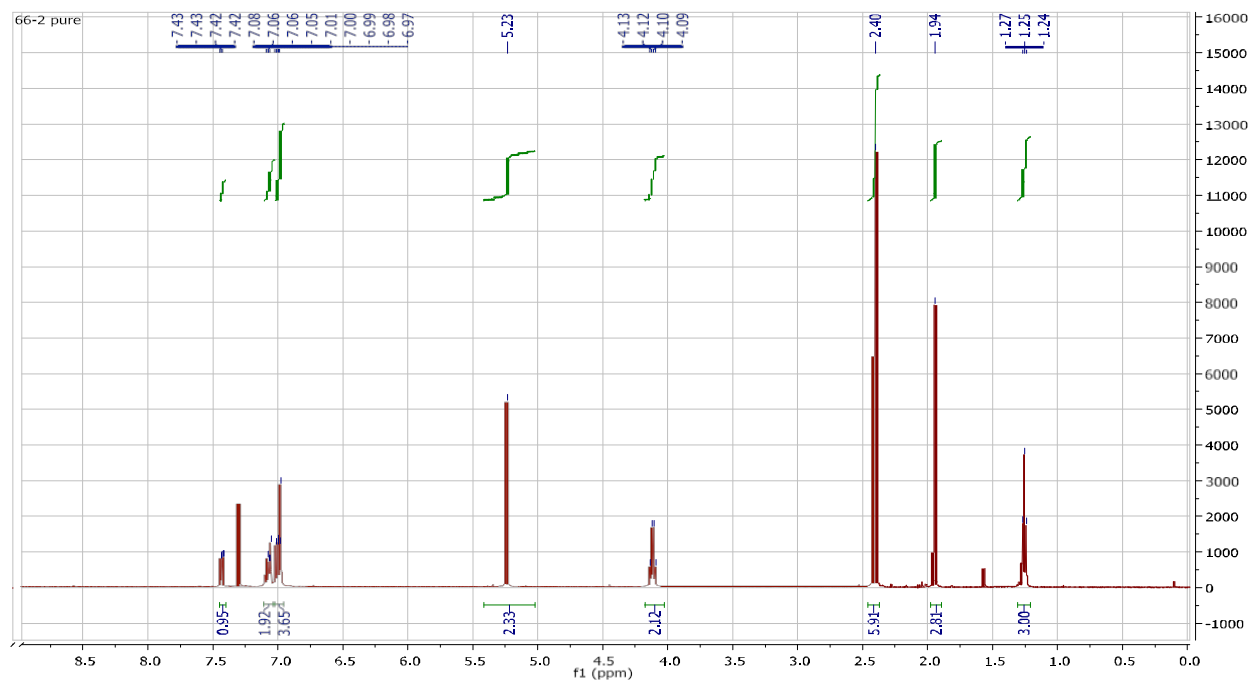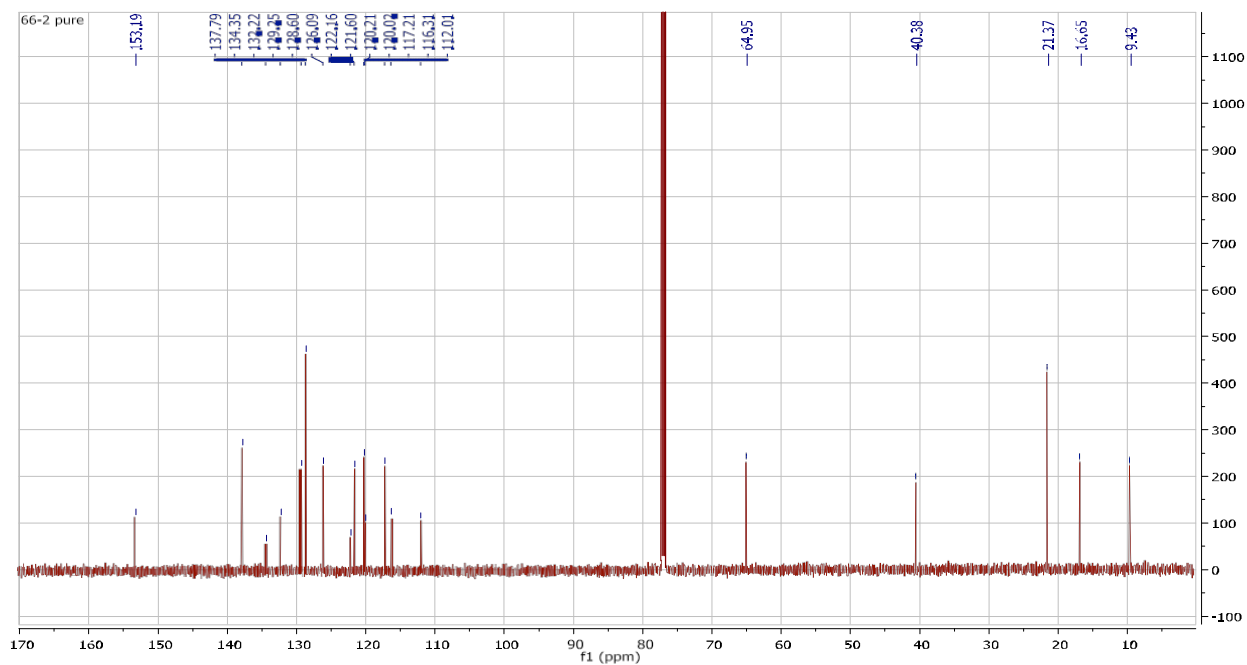

# <sup>1</sup>H and <sup>13</sup>C NMR spectra of 3q

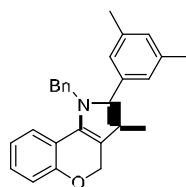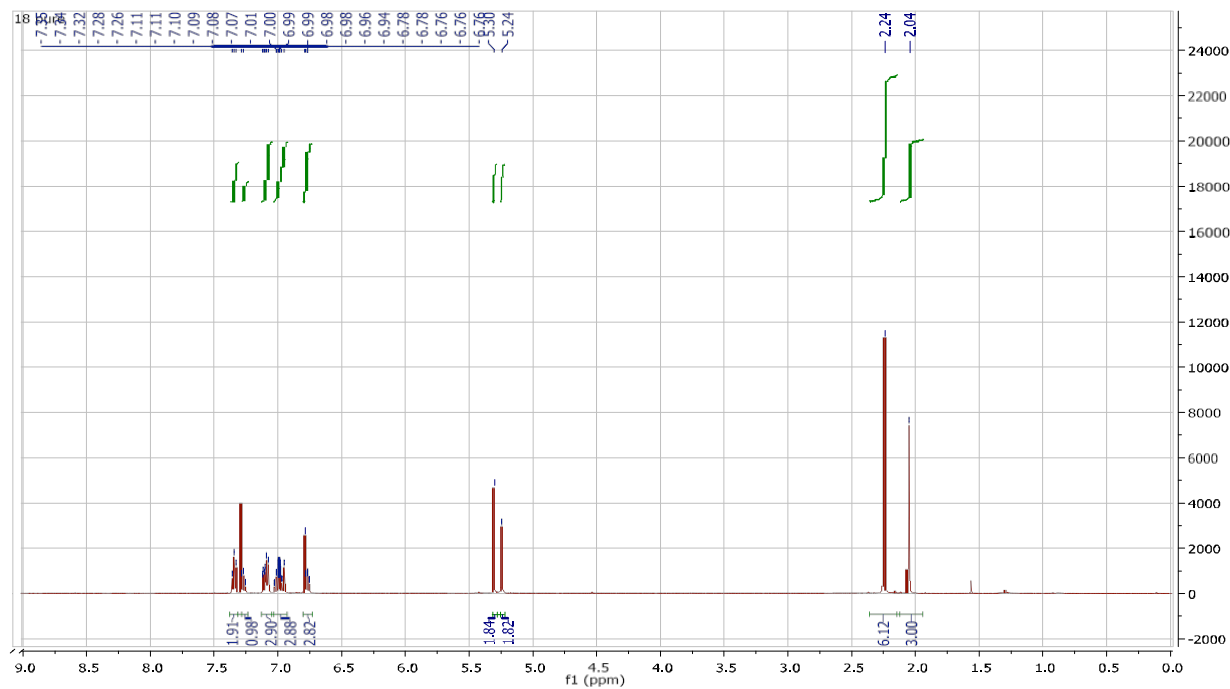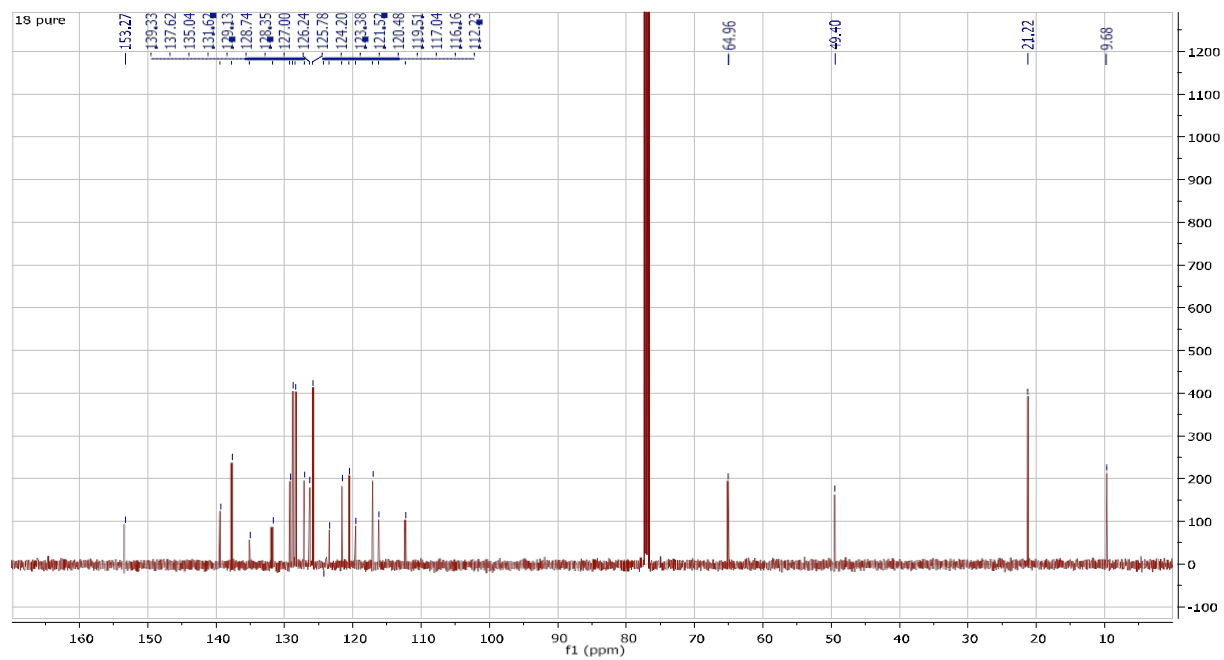

# <sup>1</sup>H and <sup>13</sup>C NMR spectra of 3r

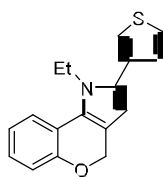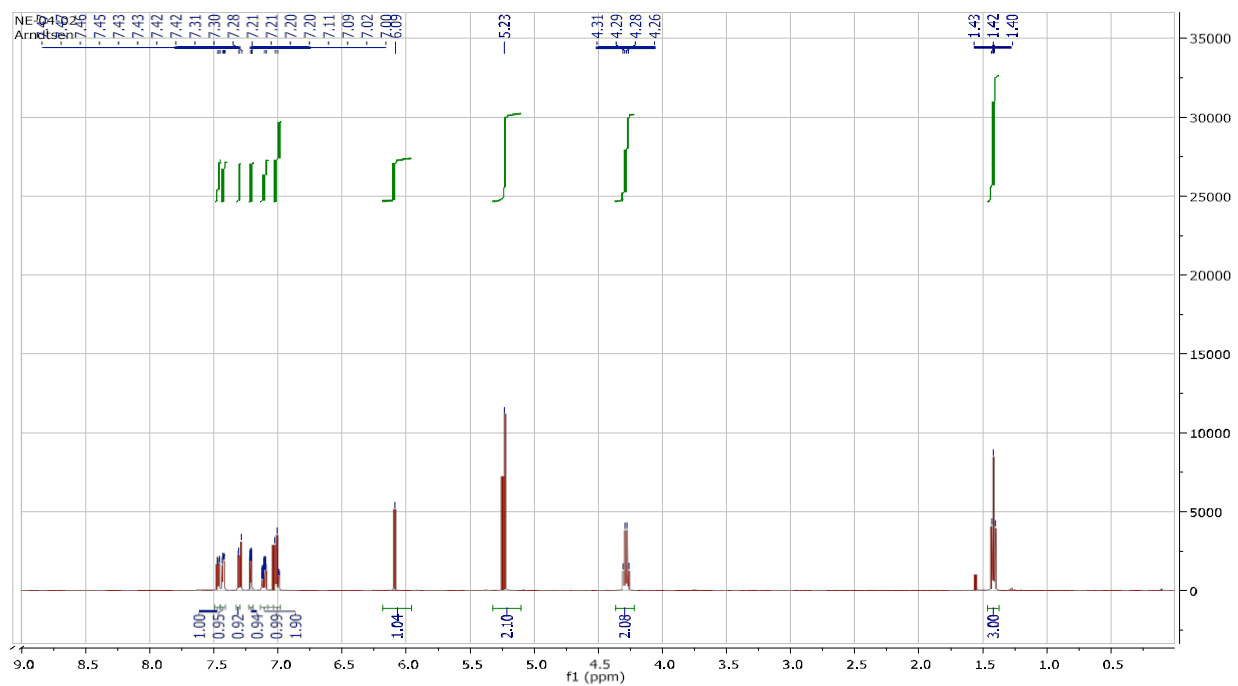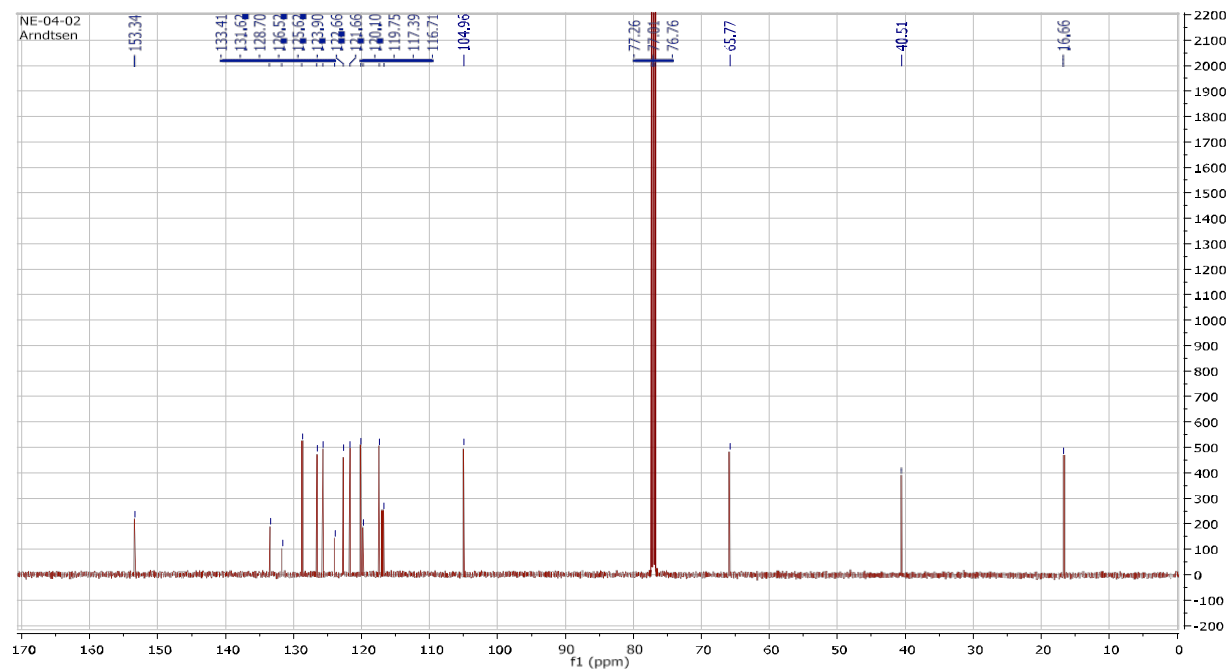

# $^1\text{H}$ and $^{13}\text{C}$ NMR spectra of 3s

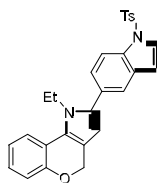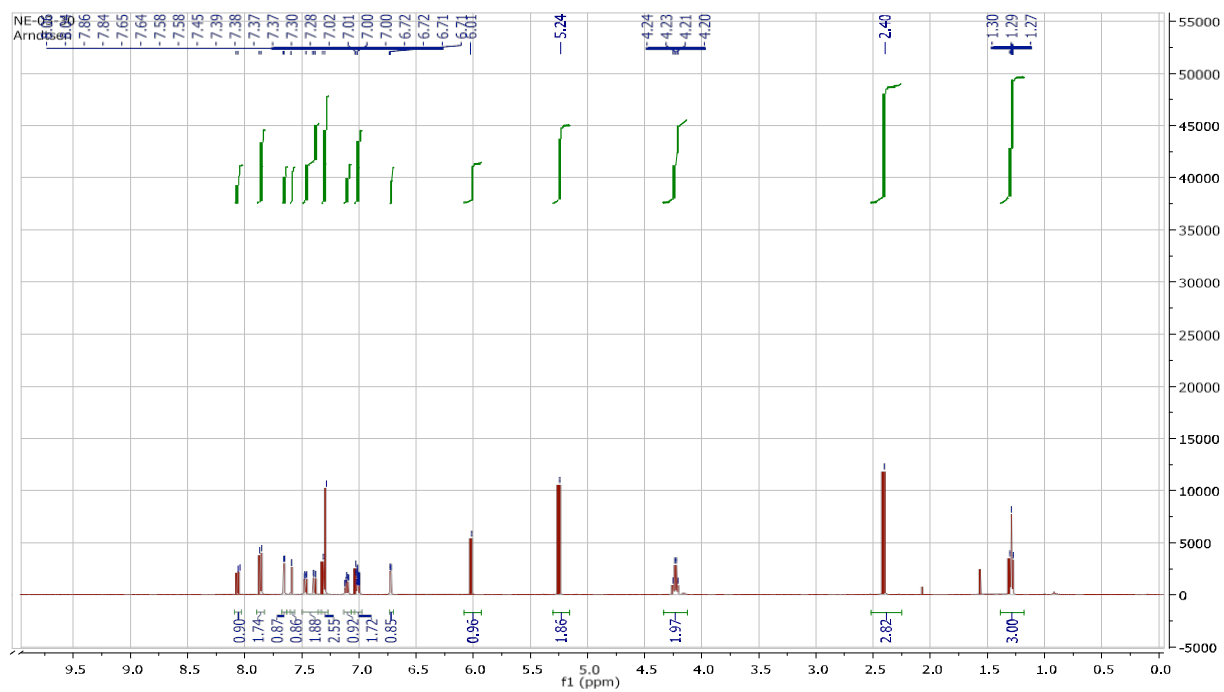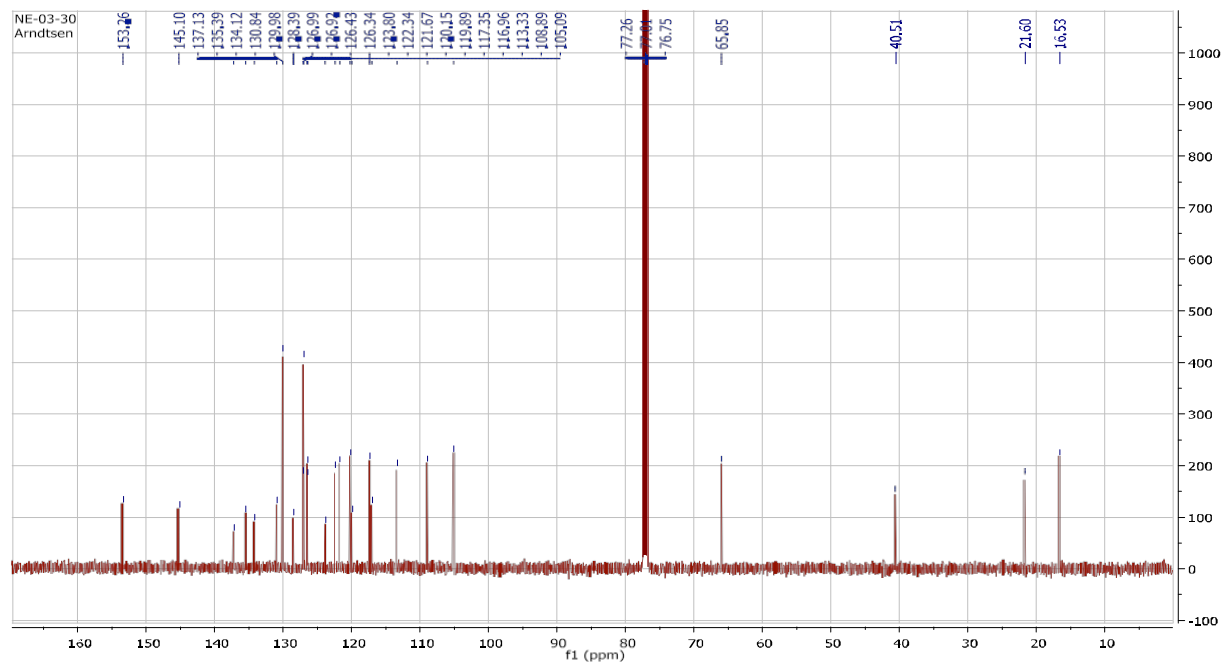

# <sup>1</sup>H and <sup>13</sup>C NMR spectra of 5a

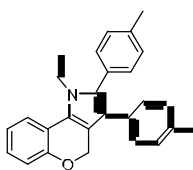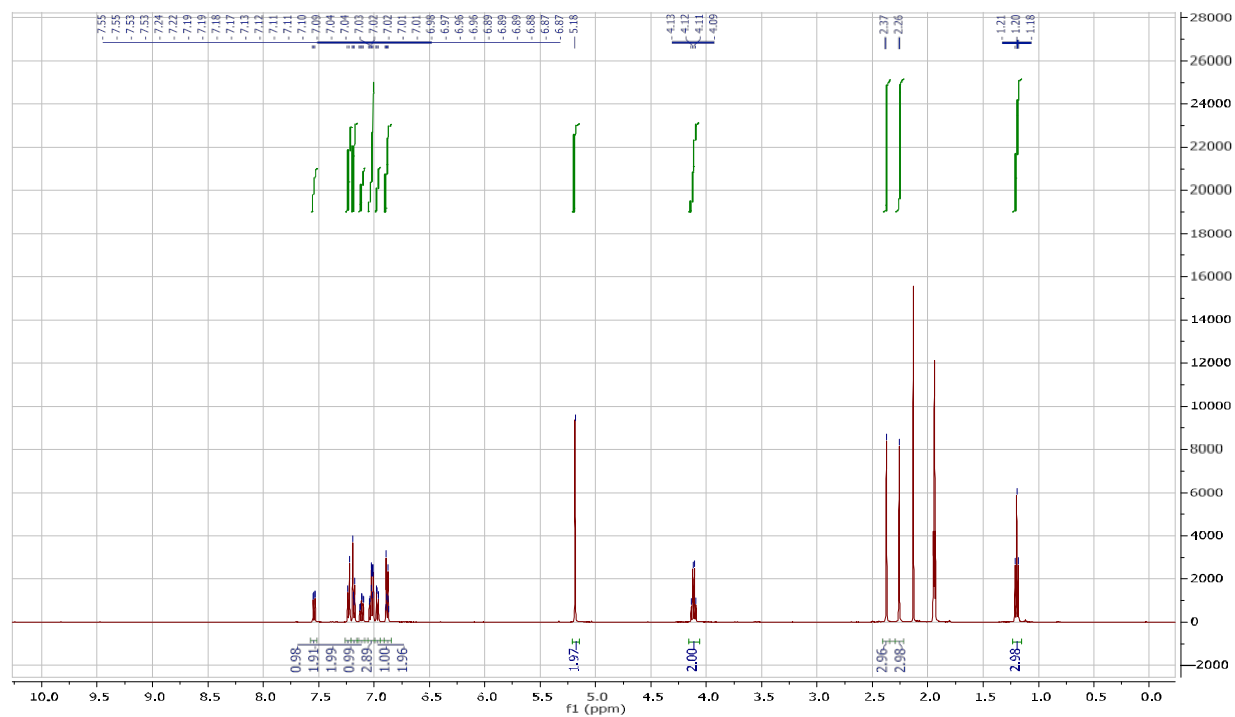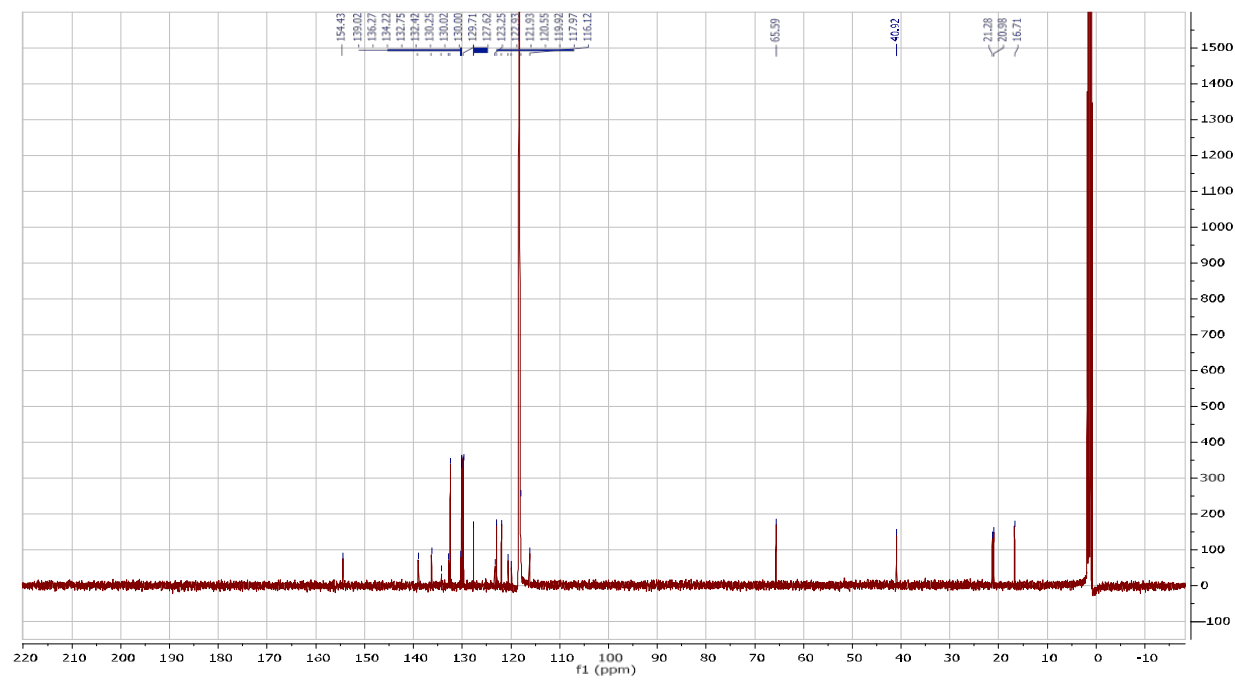

# <sup>1</sup>H and <sup>13</sup>C NMR spectra of 5b

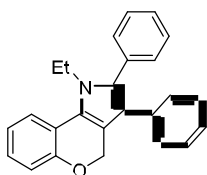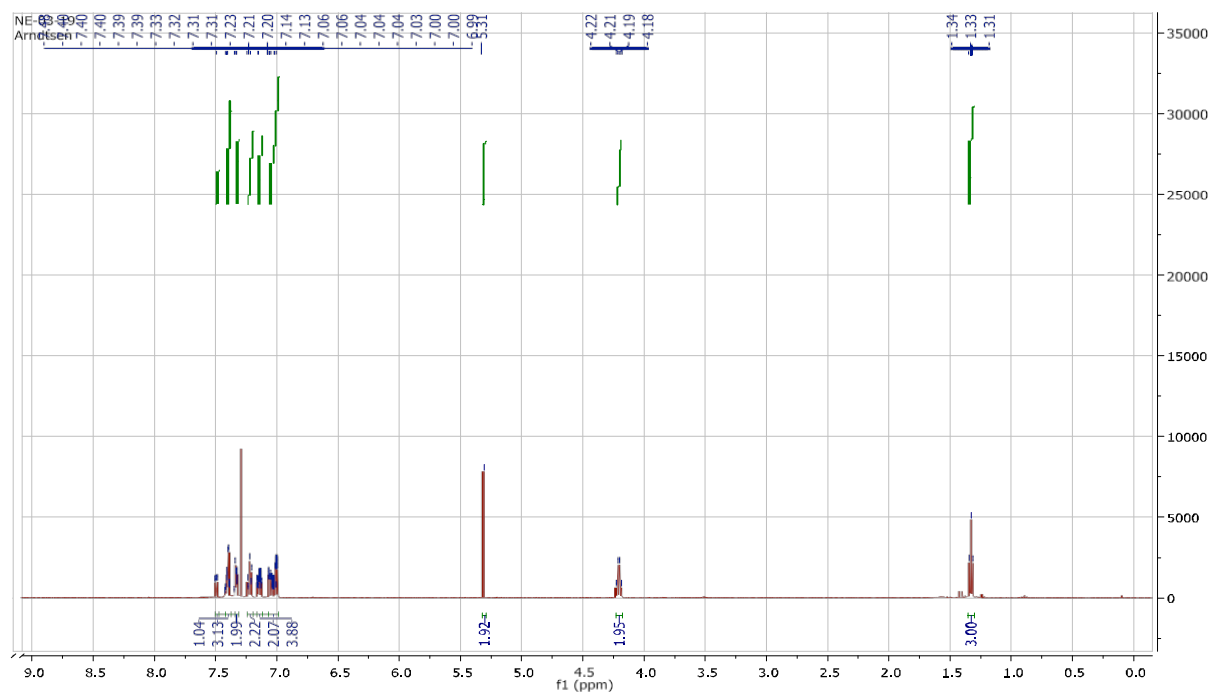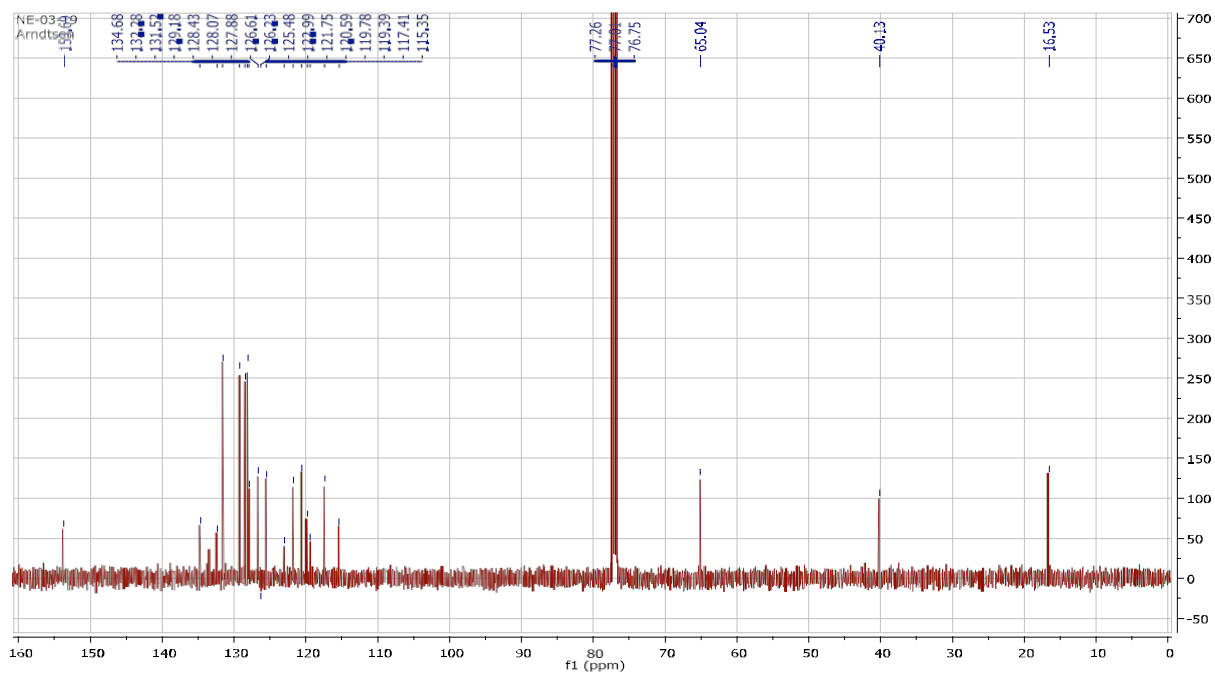

# $^1\text{H}$ and $^{13}\text{C}$ NMR spectra of 5c

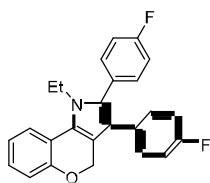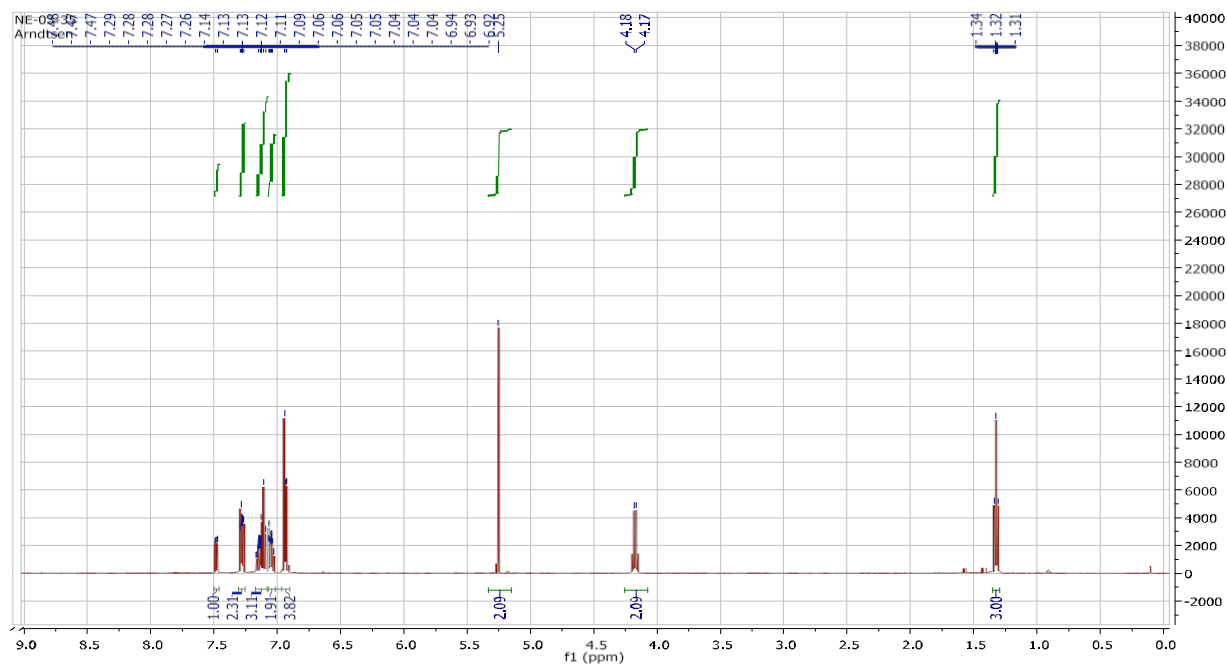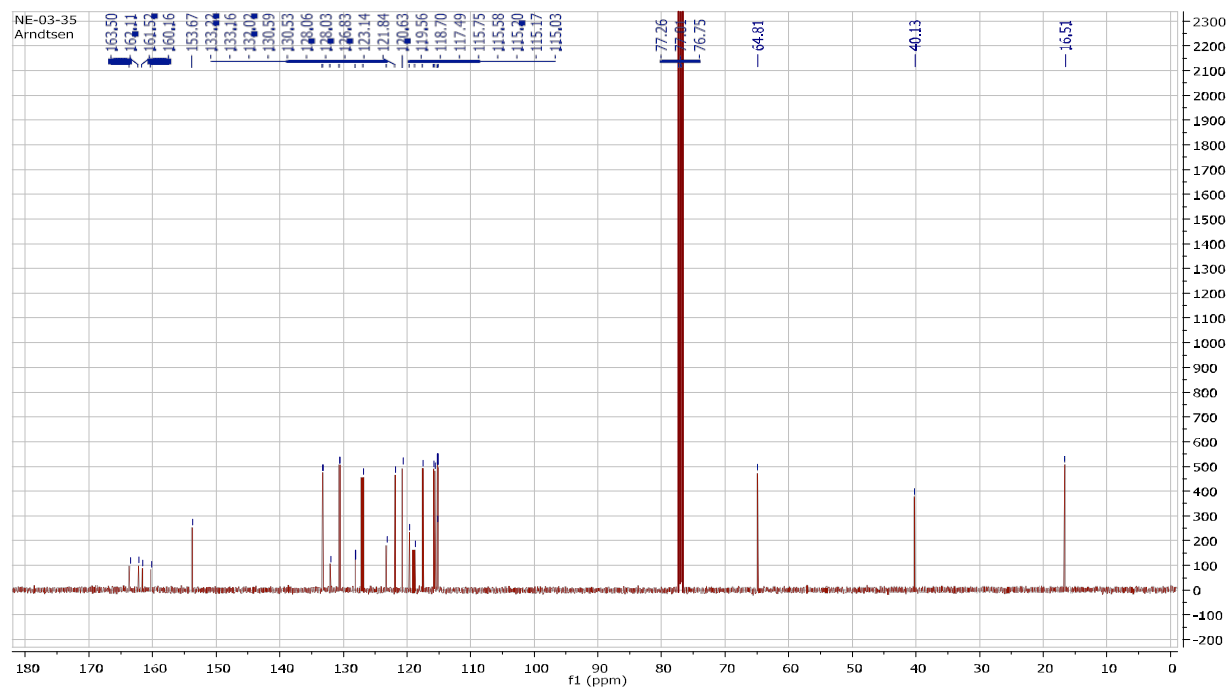

# $^1\text{H}$ and $^{13}\text{C}$ NMR spectra of 5d

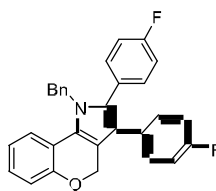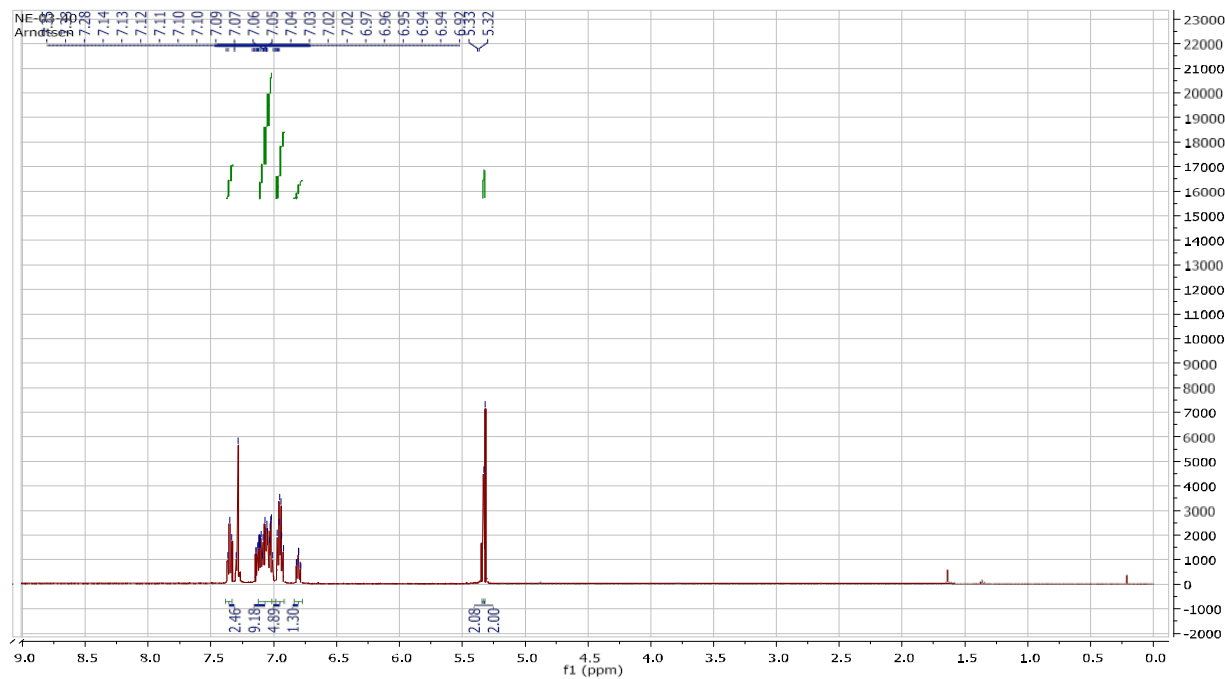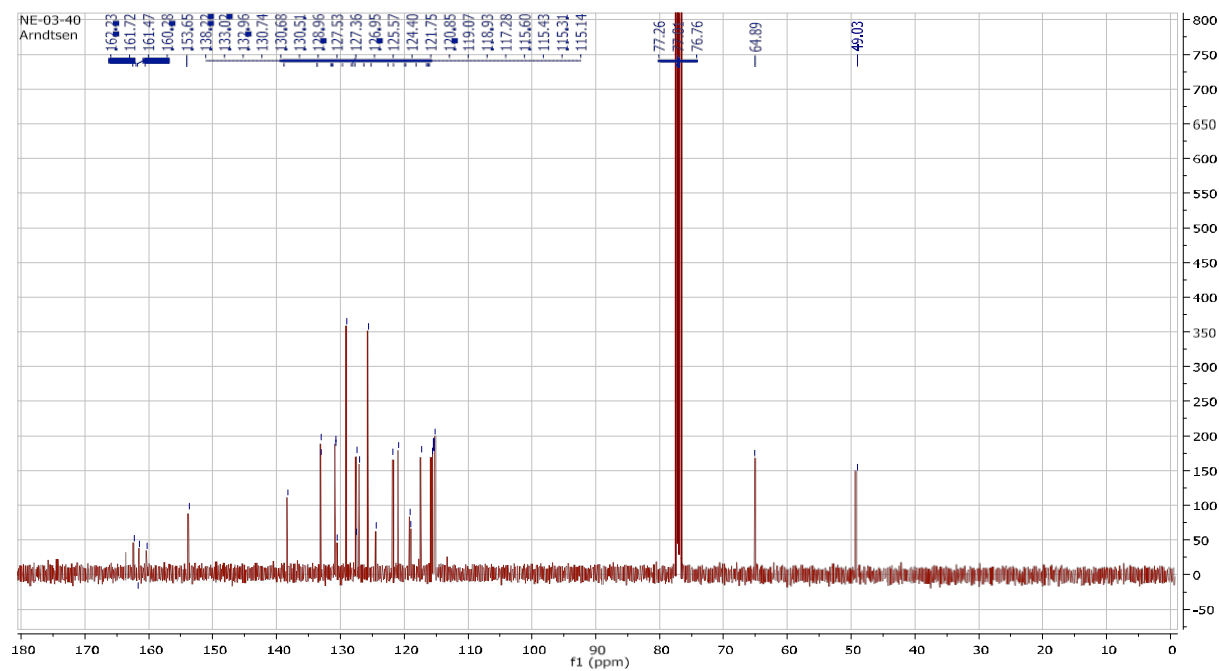



# $^1\text{H}$ and $^{13}\text{C}$ NMR spectra of 5e

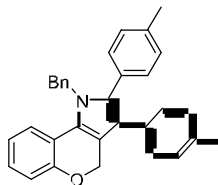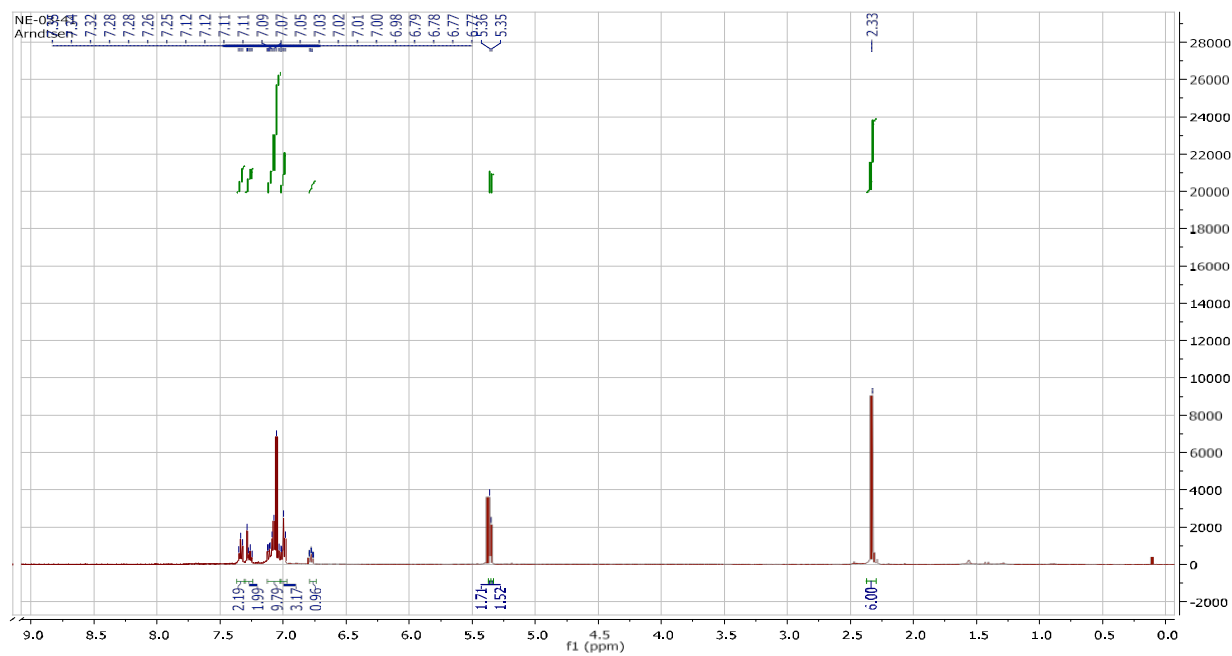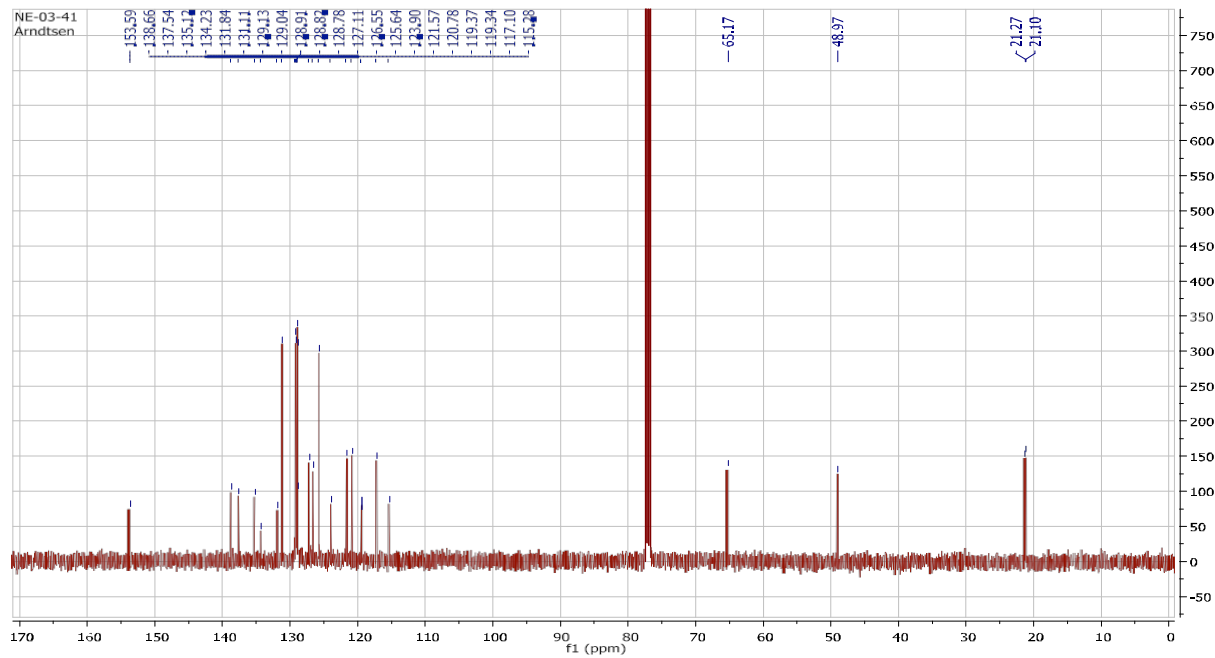

# $^1\text{H}$ and $^{13}\text{C}$ NMR spectra of 5f

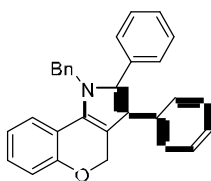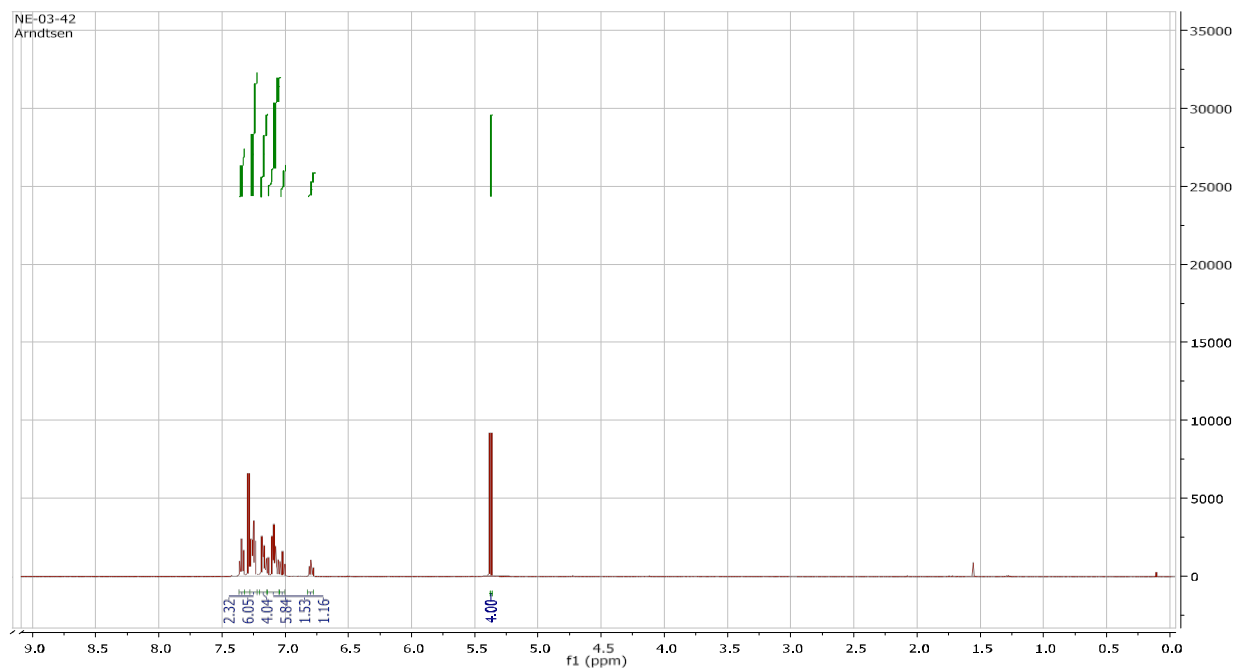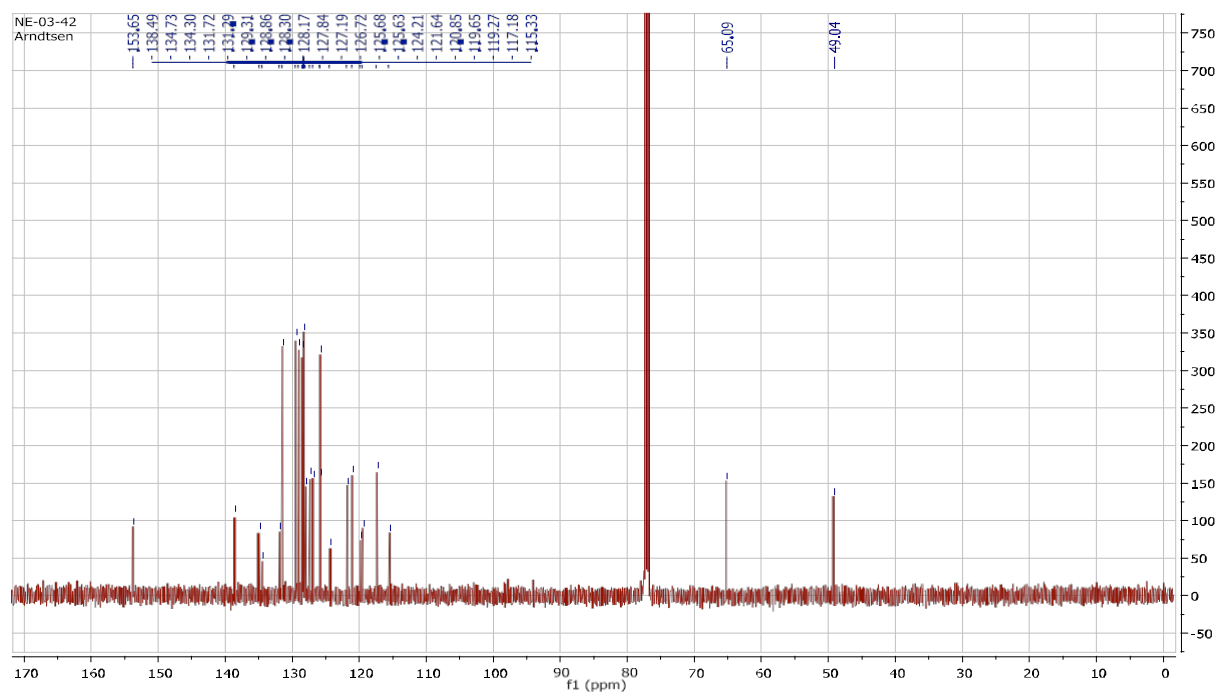

# <sup>1</sup>H and <sup>13</sup>C NMR spectra of 5g

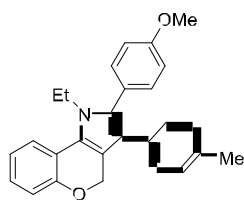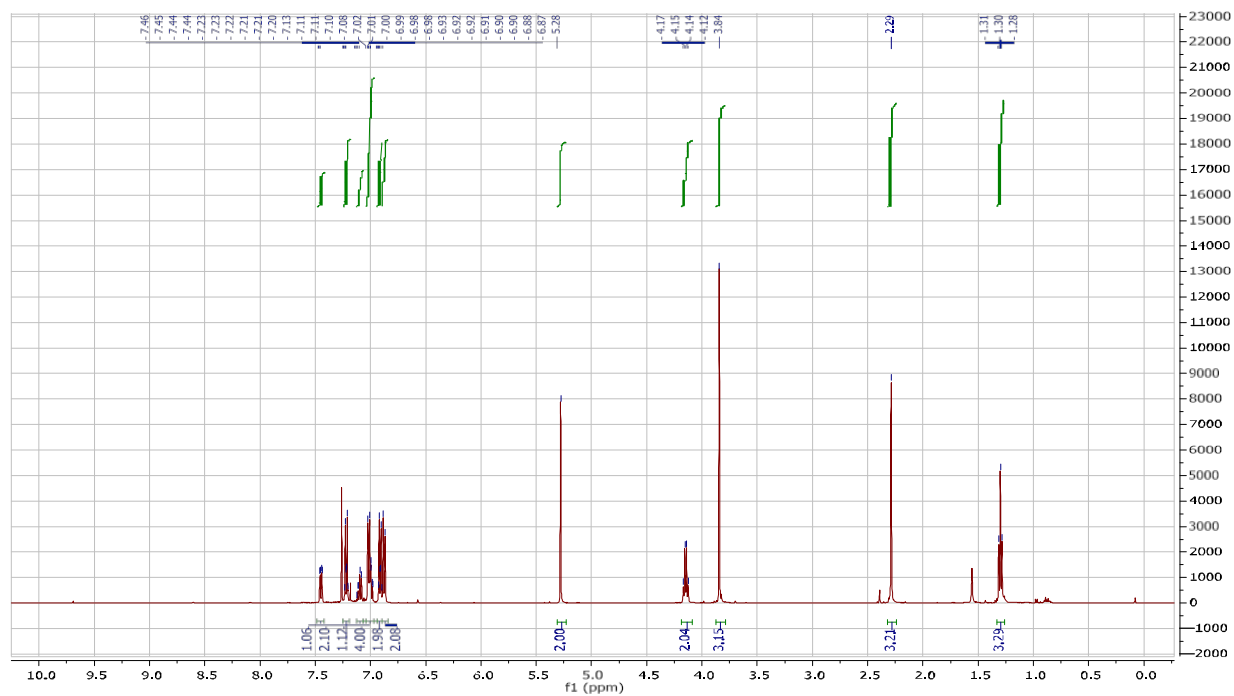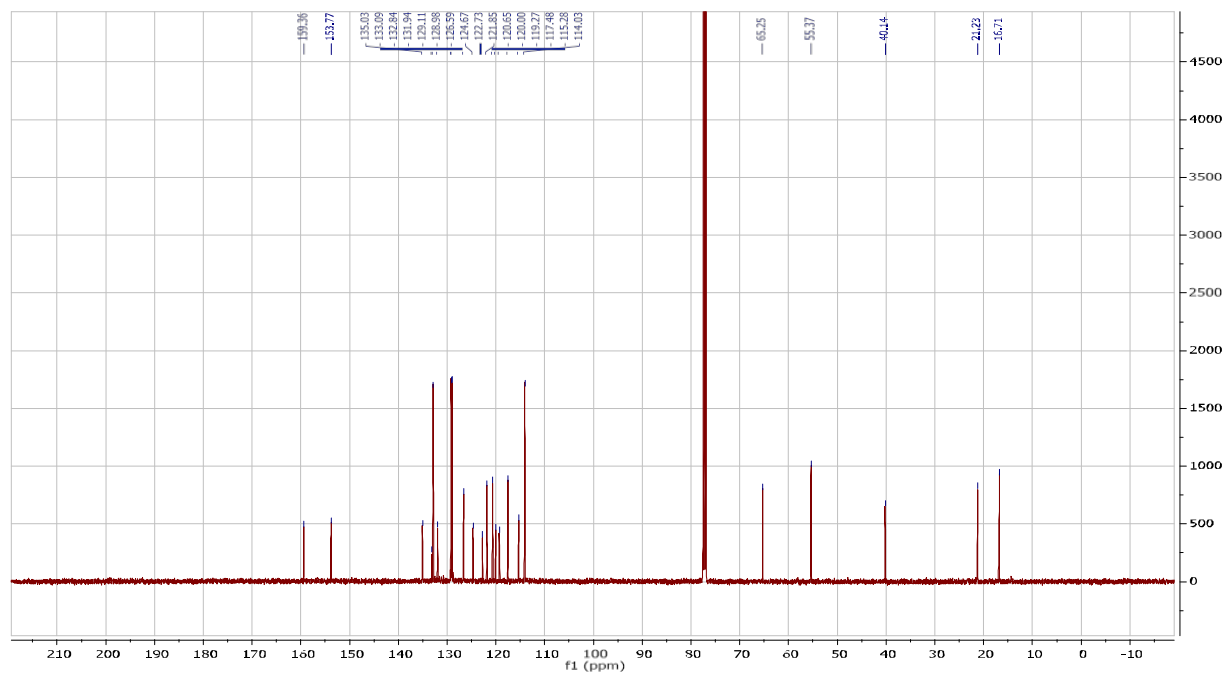

# $^1\text{H}$ and $^{13}\text{C}$ NMR spectra of 5h

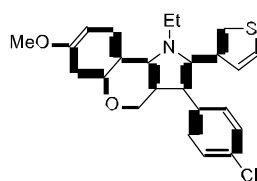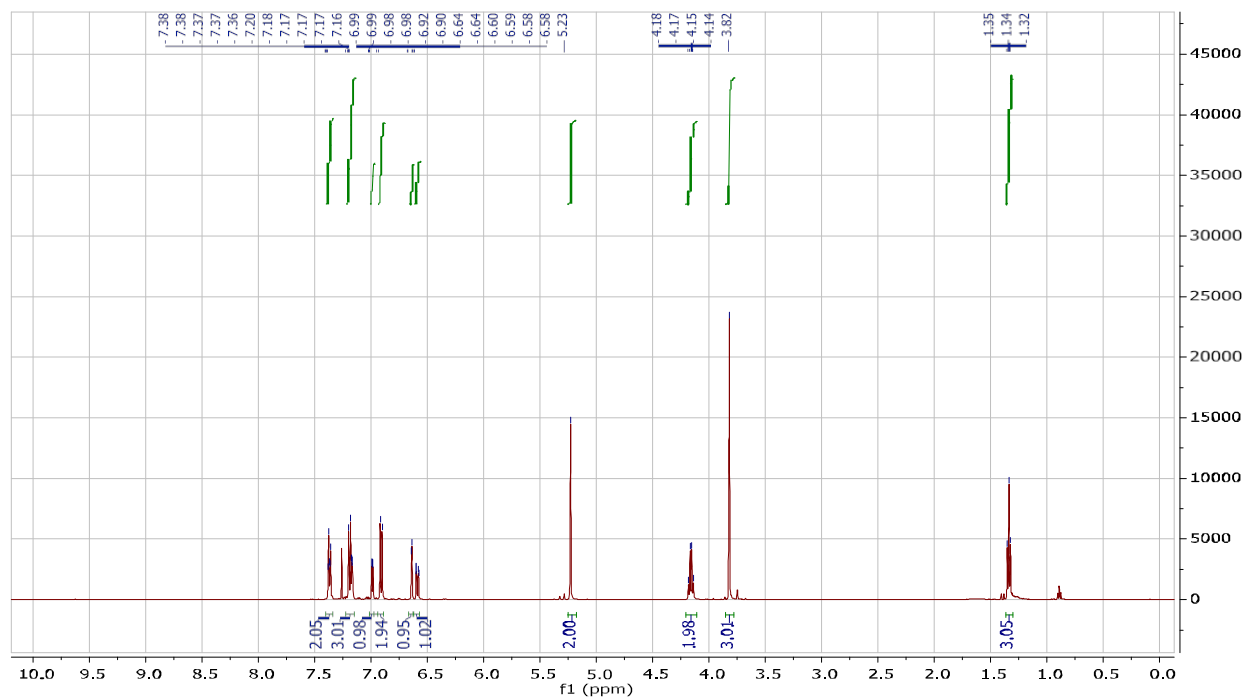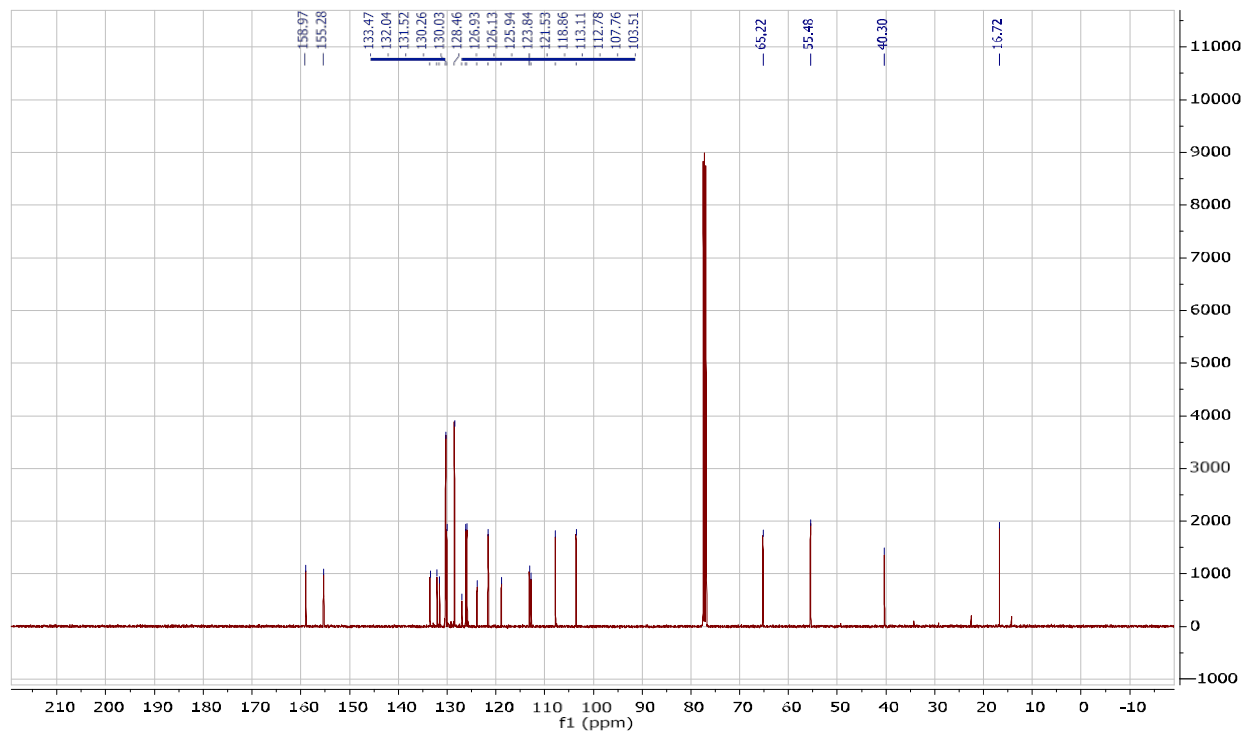

Supplement: Supplementary file 1 [file 6505857]
